# Supplementary material for: Programming sites of meiotic crossovers using Spo11 fusion proteins
Source: Oxford University Press journal article supplement (doi:10.1093/nar/gkx739), 2017-08-17
Supplement: gkx739_supp.zip [file gkx739_supp.zip]

## SUPPLEMENTARY INFORMATION

### Table S1. Yeast strain genotypes, plasmids and qPCR primers.

In addition to the indicated genotype all strains are homozygous for *ura3 trp1 lys2* and *ho::LYS2* mutations. All strains are from the SK1 genetic background (35). All yeast strains and plasmids were constructed for this work, except ORD7304 (gift from V. Borde), ORD8175, pAP1, pAP11 and p\_gRNA\_handle plasmids (21,25,34).

### Table S2. Genomic sites targeted by CRISPR-dCas9-Spo11.

To clone the guide sequence into the p\_gRNA\_handle vector, the following pair of oligonucleotides were PCR amplified:

5'-gactagccttattttaacttgctatttctagctctaaaac(N)<sub>20</sub>-3' and

5'-ctgggaacgaaactctgggagctgcgattggcagaagctt(N)<sub>20</sub>-3', where N<sub>20</sub> is the target site sequence indicated in the table. N<sub>20</sub> and N<sub>20</sub> are complementary. Lowercase texts correspond to sequences identical to the regions flanking the *HindIII* site of the p\_gRNA\_handle vector.

### Table S3. Features of the DNA binding modules used in this study to build the Spo11 fusion constructs.

<sup>a</sup> corresponds to the number of binding sites identified in the yeast genome for each DNA binding module.

<sup>b</sup> Y represent any pyrimidine.

**Table S4. Genetic assays of recombination at TSF-targeted *GAL2*, *PUT4*, *MSG5*, *HHF2* and *MSC1* regions.** After sporulation, four spore tetrads were dissected and genotyped for the segregation of the antibiotic resistance cassettes (see details in Methods). The number of parental ditype (PD) tetrads was compared to that of tetratypes (T) and non-parental ditypes (NPD). The genetic distance was determined according to the formula  $cM = 100(T+6NPD)/2(PD+T+NPD)$ . Recombination rates were compared using a two-tailed Fischer's exact test.

<sup>a</sup> Data from (25).

### Table S5. Targeting of DSB formation by the various TSFs.

**Figure S1. Nucleotide sequence of the TSF gene constructs used in this study.**

**Sequence of the *GAL4-SPO11* construct (pRSM046 plasmid).**

ATGGGAAAACCTATTCCTAATCCTCTGCTGGGCCTGGATTCTACCGGAGGCATGGCCCCCTAAGAAAAAGCGGAAG  
GTGGACGGCGGAATGAAGCTACTGTCTTCTATCGAACAAGCATGCGATATTTGCCGACTTAAAAAGCTCAAGTGC  
TCCAAAGAAAAACCGAAGTGCGCCAAGTGTCTGAAGAACAAGTGGGAGTGTGCTACTCTCCCAAAACCAAAAGG  
TCTCCGCTGACTAGGGCACATCTGACAGAAGTGAATCAAGGCTAGAAAGACTGGAACAGCTATTTCTACTGATT  
TTTCCTCGAGAAGACCTTGACATGATTTTGAAGTGGATTCTTTACAGGATATAAAAGCATTGTTAACAGGATTA  
TTTGTACAAGATAATGTGAATAAAGATGCCGTCACAGATAGATTGGCTTCAGTGGAGACTGATATGCCTCTAACA  
TTGAGACAGCATAGAATAAGTGCACATCATCATCGGAAGAGAGTAGTAACAAAGGTCAAAGACAGTTGACTGTA  
TCGATTGACTCGGCAGCTCATCATGATAACTCCACAATTCCGTTGGATTTTATGCCCAGGGATGCTCTTCATGGA  
TTTGATTGGTCTGAAGAGGATGACATGTCGGATGGCTTGCCCTTCCTGAAAACGGACCCCAACAATAATGGGTTT  
TTTGGCGACGGTTCTCTTATGTATTCTTCGATCTATTGGCTTTAAACCGGAAAAATTACACGAACCTCAACGTT  
AACAGGCTCCCGACCATGATTACGGATAGATACACGTTGGCTTCTAGATCCACAACATCCCGTTTACTTCAAAGT  
TATCTCAATAATTTTACCCCTACTGCCCTATCGTGCACCTACCGACGCTAATGATGTTGTATAATAACCAGATT  
GAAATCGCGTCGAAGGATCAATGGCAAATCCTTTTAACTGCATATTAGCCATTGGAGCCTGGTGTATAGAGGGG  
GAATCTACTGATATAGATGTTTTTACTATCAAAATGCTAAATCTCATTGACGAGCAAGGTCTTCGAGTCAGGT  
TCCATAATTTTGGTGACAGCCCTACATCTTCTGTGCGATATACACAGTGGAGGCAGAAAAACAAATACTAGCTAT  
AATTTTACAGCTTTTCCATAAGAATGGCCATGATGCTGGGCTTGAATAGGGACCTCCCTCGTCTTCAGTGAT  
AGCAGCATTCTGGAACAAAGACGCCGAATTTGGTGGTCTGTCTACTCTTGGGAGATCCAATTGTCCCTGCTTTAT  
GGTCGATCCATCCAGCTTTCTCAGAATACAATCTCCTTCCCTTCTTCTGTGCGACGATGTGACGCTACCACAACA  
GGTCCCACCATATATCATGGCATCATTGAAACAGCAAGGCTCTTACAAGTTTTTCAAAAAATCTATGAACTAGAC  
AAAACAGTAACTGCAGAAAAAGTCTATATGTGCAAAAAATGCTTGATGATTTGTAATGAGATTGAGGAGGTT  
TCGAGACAGGCACCAAAGTTTTTACAAATGGATATTTCCACCACCGCTCTAACCAATTTGTTGAAGGAACACCCCT  
TGGCTATCCTTTACAAGATTGCAACTGAAGTGGAAACAGTTGTCTCTTATCATTATGTATTAAGAGATTTTTTTC  
ACTAATTTTACCCAGAAAAAGTCACAACTAGAACAGGATCAAAATGATCATCAAAGTTATGAAGTTAAACGATGC  
TCCATCATGTTAAGCGATGCAGCACAAAGAAGTGTATGTCTGTAAGTAGCTATATGGACAATCATAATGTCACC  
CCATATTTTGCCTGGAATTGTTCTTATTACTTGTTCATGTCAGTCCCTAGTACCCATAAAGACTCTACTCTCAAAC  
TCAAAATCGAATGCTGAGAATAACGAGACCGCACAAATTATTACAACAAATTAACACTGTTCTGATGCTATTAAAA  
AAACTGGCCACTTTTAAATCCAGACTTGTGAAAAATACATTCAAGTACTGGAAGAGGTATGTGCGCCGTTTCTG  
TTATCACAGTGTGCAATCCCATTACCGCATATCAGTTATAACAATAGTAATGGTAGCGCCATTAAAAATATTGTC  
GGTTCGTCAACTATCGCCCAATACCCTACTCTTCCGGAGGAAAAATGTCAACAATATCAGTGTTAAATATGTTTCT  
CCTGGCTCAGTAGGGCCTTACCTGTGCCATTGAAATCAGGAGCAAGTTTCAGTGATCTAGTCAAGCTGTTATCT  
AACCGTCCACCCTCTCGTAACTCTCCAGTGACAATACCAAGAAGCACACCTTCGCATCGCTCAGTCACGCCTTTT  
CTAGGGCAACAGCAACAGCTGCAATCATTAGTGCCACTGACCCCGTCTGCTTTGTTGGTGGCGCCAATTTTAAAT  
CAAAGTGGGAATATTGCTGATAGCTCATTGTCTTCACTTCTACTAACAGTAGCAACGGTCCGAACCTCATAACA  
ACTCAAAACAAATTTCAAGCGCTTTCACAACCAATTCCTCTTAACGTTTCATGATAACTTCATGAATAATGAA  
ATCAGCGCTAGTAAATTTGATGATGGTAATAATTCAAAACCACTGTACCTGGTTGGACGGACCAAACTGCGTAT  
AACGCGTTTGAATCACTACAGGGATGTTTAAATACCACTACAATGGATGATGTATATAACTATCTATTTCGATGAT  
GAAGATACCCACCAAAACCAAAAAAGAGCCGGAATTTATGGCCATGGAGGCCCCGGGGATCCGTATGGCTTTG  
GAGGGATTGCGGAAAAATATAAAACAAGGCAGGAATTGGTCAAAGCACTCACTCCTAAAAAGACGGTCCATTAC  
TTGAACTCCAATGGTCACTCCAACGGAACCTCCCTGTTCAAACGCAGATGTTTTGGCTCATATTAAGCATTTCTCTG  
TCATTGGCGGCTAATTCATTAGAGCAACATCAACAGCCTATTTCAATCGTCTTTCAAAACAAAAAAGGC  
GATACAAGCAGTCTGACATTACACAACATTGGACTTCCCTTTGAATGGCCGCTATATGCACTCATCAGTTC  
AAGTTGAAAAGATGCGCAATCCTTTTAACTTATTGAAAGTCGTTATGGAAAAATTACCGCTAGGTAAAAACACT  
ACAGTGAGAGATATCTTCTACTCCAACGTGGAATTGTTTCAAAGACAAGCAAACGTAGTCCAGTGGCTGGACGTT  
ATACGCTTTAATTTCAAGCTCTCTCCAAGAAAATCCTTAAACATTATACCAGCTCAAAAGGGTTTAGTTTATTCG  
CCTTTCCCCATTGATATTTATGACAATATTCTGACATGTGAAAATGAACCAAAAGATGCAAAAGCAAAACAATTTTC  
CCTGGTAAGCCCTGTCTAATTCATTTTCCAAGATGATGCGGTCAAGTTAGGGACAACAAGTATGTGTAAT  
ATTGTAATAGTGGAAGAAAGCTGTCTTACCAAATTAGTAAATAATTATCACAAGTTGAGTACAAATACCATG  
CTCATTACAGGTAAGGGATTTCCAGATTTCTTGACAAGGTTATTCTTAAAAAACTAGAACAAATATTGCTCCAAA  
TTGATATCGGACTGTTCTATATTTACCGATGCGGACCCCTATGGGATTAGCATAGCCCTAAATTTACTCACTCG  
AATGAACGCAACGCTTATATTTGCACGATGGCAAACATAAAGGAATTCGATTACGCAAGTTTGGCACAAAAAT  
AATGAAGTGCATAACAAATCCATTCAATTATTGAGTTTGAATCAGCGGACTACTCCTTAGCCAAGAATTTGATA  
GCATCTGTGACTGCAACAGCTGGGATATTGCAACTTCACCATTAAGAAGCTCATCATAGATGTCAGCGGGAA  
ATTTTTTTCCAAAAGAAAGCTGAAATGAACGAGATTGATGCCAGAATTTTTGAATACAAATGA

### Sequence of the *TEC1-SPO11* construct (pRSM026 plasmid).

ATGAGTCTTAAAGAAGACGACTTTGGCAAGGATAATTCTAGAAATATAGAATCATATACTGGTAGAATTTTTGAC  
GTATATATACAAAAAGATTTCGTATTCACAGTCGGCCTTGGATGATATGTTTCCAGAAGCCGTAGTTTCAACCGCC  
GCTTGTGTGAAAAATGAAGCGGAGGATAACATCAATCTCATAGACACGCATCCTCAATTCGAAGTGGTAAATACT  
GGACTGGGTGCTAAATCGGACGATTTGAAATCTCCATCAGCAAAGGCTACGTTCACTGACAAGCAGAGGAAGAAAT  
GAAGTACCAAATATATCTGTGAGCAACTACTTTCCCGGACAAAGTAGCGAAACGTCGTCACAAACCGGAATCTTGG  
ACTATCGGTTGTGATAAGTGGTCAGAAAAGGTAGAAGAGGCATTCTTGGAGCACTTAGACTGATAATGAAAAAT  
GGGACCACAAAAATAAAAAATAAGAAATGCCAATTTTGGAAAGAAACGAGCTGATTTTATTATATATCAAGCACAAA  
ACCAACGAGTTTCAAGAACCAAAAAAGCAAATTTCTTCCCATATTCAAGTCTGGAAGAAGACCATACAAAAACAAATC  
AAGGACTCGCTGACCCTATCATCAAAGGAGAAGGAGCTTCTACACCTTATCGAACATGGCGCTGAACAAACTACT  
GAAAACCTCAAACCTGTTTTATGACATATTTGAAGAAATTATCGACTCTCTACCTTCACTCAGTCAGTGATTCTGGAAGT  
TTAAGCCCTAAAAACCTCTATGTAAGTAATAATAGCAGTGGATTGTGAGTACATTCAAACCTGCTTACGCCAATC  
ACTGCTTCCAACGAGAAAAAATTGAAAATTTTCAAAAACTAATGCTGCATCTCAAGCCAAAACCCCCCTCATTT  
TACGCTAAGCACATTTTATGAAAACATAGACGGCTACAAGTGCCTTCCGTCAAAAGAGGCCTCTTGAACAACTTTCC  
CCCACGGAACCTCCACCAGGGAGATCGCCCCAATAAGGCTAGCTTTTTCCAACAAGAAGGCAATCCTGGAGAGTGCA  
AAAAAATCGAAATAGAGCAGAGAAAGATAATCAACAAATACCAAAGAATTTCCCGCATACAAGAATGAAAGT  
AATCCTGAGTTTCAAGTTTCAATTTCCGTTTCAAGTACGAATCGGAGGAAGAAGTAGTCCCAAGATCAGCC  
ACAGTCACACAACCTCAAAGCAGACCACTGCCATACTACAAGAATAATGGAATGCCCTACTCACTCTCCAAAGTA  
CGAGGAAGGCCCATGTATCCAAGACCTGCTGAAGATGCTTACAATGCCAATTATATTCAAGGTCTGCCCCAGTAC  
CAAACATCTTATTTTTTCGAGCTGTTATTATCATCACCCAGCATTACGAACATTCTCCACATCAAAGGAACCTT  
ACGCCATCCAACCAATCGCATGGGAACCTTTATCCGGAATTTATGGCCATGGAGGCCCCGGGGATCCGTATGGCT  
TTGGAGGGATTGCGGAAAAAATATAAAACAAGGCAGGAATTGGTCAAAGCACTCACTCCTAAAAGACGGTCCATT  
CACTTGAACCTCAATGGTCACTCCAACGGAACCTCCTGTTCAAACGCAGATGTTTTGGCTCATATTAAGCATTTT  
CTGTCAATTGGCGGCTAATTCATTAGAGCAACATCAACAGCCTATTTCAATCGTCTTTCAAAAACAAAAAAAAAAAA  
GGCGATACAAGCAGTCCTGACATTCACACAACATTGGACTTCCCTTTGAATGGCCCCGCATCTATGCACTCATCAG  
TTCAAGTTGAAAAGATGCGCAATCCTTTTAACTTATTGAAAGTCGTTATGGAAAAATTACCGCTAGGTAAAAAC  
ACTACAGTGAGAGATATCTTCTACTCCAACGTGGAATTGTTTCAAAGACAAGCAAACGTCAGTCCAGTGGCTGGAC  
GTTATACGCTTTAATTTCAAGCTCTCTCCAAGAAAATCCTTAAACATTATACCAGCTCAAAAGGGTTTAGTTTAT  
TCGCCTTTTCCCATTTGATATTTATGACAATATTCTGACATGTGAAAATGAACCAAAGATGCAAAAGCAAACAATT  
TTCCCTGGTGAAGCCCTGTCTAATTTCCATTTTCCAAGATGATGCGGTCAAGTTAGGACAACAAGTATGTGT  
AATATTGTAATAGTGGAAGAAAGAGCTGTCTTCAACAAATTAGTAAATAAATTATCACAAGTTGAGTACAAATACC  
ATGCTCATTACAGGTAAGGGATTTCCAGATTTCTTGACAAGGTTATTCTTAAAAAACTAGAACAATATTGCTCC  
AAATTGATATCGGACTGTTCTATATTTACCGATGCGGACCCCTATGGGATTAGCATAGCCCTAAATTATACTCAC  
TCGAATGAACGCAACGCTTATATTTGCACGATGGCAAATATAAAGGAATTTCGTATTACGCAAGTTTGGCACAA  
AATAATGAAGTGCATAACAAATCCATTCAATTATTGAGTTTGAATCAGCGCGACTACTCCTTAGCCAAGAATTTG  
ATAGCATCTCTGACTGCCAACAGCTGGGATATTGCAACTTACCATTAAAGAACGTCATCATAGAATGTCAGCGG  
GAAATTTTTTTTCCAAAAGAAAGCTGAAATGAACGAGATTGATGCCAGAATTTTTTGAATACAAATGA

### Sequence of the *RSC3-SPO11* construct (pRSM070 plasmid).

ATGGATATTTCGTGGTAGAAAAATGAAAAAACCGCCTGCATGCGTGCAGTGCCGTAAGAGGAAGATAGGCTGCGAT  
CGTGTTAAGCCGATTTGTGGGAACGTATGAAGCATAATAAATGGACTGCTTTTATCCGGACGTTCCCGGACAA  
TACGTTCCCTCTAGTTCTTCCCTCTTCCAATACACGCCAAGTAGCCAACGGTCCGTACTTAACTCTTATTACGCT  
TCTCGTCTGTCTCCAAGGAACTGCTGCACCTTTTGCAAGAAAAATCCAGAAGTGGCTTCTTTGGAGCAAAATAAGA  
GAATACAACACGCGTCTGCAACTGCTCAATGCTCAAAATCAACTTAATAATAGATCATCTGCGGCAAAATGCAACC  
TTGAATCAACAACACACTCAATATATTCCAAAATCAGTGCCTTCTTGGAAAAGTAAGCCAGTCACTTCTGCAAAAC  
GAATCTTCTACTCCACTCAATTGGGTTCAAGGCCCTGCAATTTTTTCATATGCTAACCTCTCCTTACACACAAGAT  
GAAATCATCAATCATGAAATGAATTTCTTGAAAGGCAGACTACTGGAATTGCAAGAAATTACAGGTAAGAAAAATT  
ACGGGAGTAAATCTTGATCTCAAGCAGGATTCCTCAGCGCAAATGCAGTCTTCACTCCAATAGAAAACCAAGAG  
GAGTTTTTGGACAATTAAGAAAAGAAAAGTGAAGTGAAGACGGCGTTACGGACGGGGACGGTAAGCCAATTCAGAG  
AGTGAAAGAAGACCTCATCTTAATGAATTTAAGGATTTAGATCCTCAATTTTTTGATACTAATAAAGTTTTTAAT  
GTGTTTAATTTCTGCTATTTTCAAGAAGGTAGAAACAGATTATGGCTGTTACCAAAAAATATAAATAAAGTTCT  
ATCTTCCAGATTCAGTATTTGATTGAACGTGATCCTTTCTTATTCAAATCTTCAATGACTTGAATATATTAATT  
GAAACGCAATTTAATGGACCTTTGCACGATTTGGTAGCAAGCCGTAACAGTATTGAGCGCAACAGTGGCATATCT  
CAAATATTAAAGTTTCTTCCAAATCGATAACACAGACCCTTATCAACAAATACTTATCCACGATAACGGAAACG  
AATTCAAATACTTCCAAATATTAACCAAAAGAGACTATTACCCATAGTTGAGCAGCTTTTTCTTCTAACACCATT  
AATAAGCCAAATTTCTAAAGATTTTGAACCTATTTTTCAAGTTTTTAGTGTGACCAATGATCAGCTACTAAATCTA  
GGATTTATTACTCTCTGTCTCTGATTCTTTTTGAATCGTTGAATCTACGGTTTTGATTCTCTTAGAGATGAT  
GAACACTTGCAATTATTCAATGTGTTATTCACTACTTGCCTTTGTTGAAGTCTAATTTAACAACGCTTAGATTT

GAAATTGAAAAAAGGTCAATGTGTAATATAGAGACCCTGCGGTTTATTTCTTTGTGGAAATATTACCAATTTGTG  
 ATGGACACGTCGTCATCGTCCTCTTTTCGTAATTGATTACGACGAAGATATGCATATGGCATGTTTACTATCGTTA  
 AATCATGAAACTCAAAATCAATCTCATATTTTGACCTGGAATTTTCATATTTAAGAACTACTGCTGGAGACACCTT  
 TTCTTAGGTCAATTGCCGTTGCTAATGTCTGAACCTTTACAAAATTCTACCCCAATTATTGATCCTTTGTTGAAC  
 AACGATTTTGAATTGATTGATTTTGAAGTAACTTGATGAAATATTTGCAAAGTAAAGATCAACAACATATCCATT  
 GATAAAATTATACAGTTAATCAAGCTTTTGAAAAATAAGAATATCGAGGTCAGCCAAGGATGTTTAACGACTCCT  
 TCAATAATTAATAATATCATGGATTCTCTAATCTACAGGAATTCAATGTTATATTTGAACTTTTACCTCTTATTG  
 CAATTTGAAACATTGAAAAATTATGCTAAATTTAACGAAATTTTGAAGACTTTTGAATTTGTCGAGGGAGACC  
 TTGTTCTTTGTTTTCTCGAAGCTTAGCCAATATTAAATTTGCTGGTCATGAATTCACATTCATCAATAAATCTATT  
 GTGGTTCTGCAAACCTTTAGTTTTAATGCTTTTGGCGCTCTATCAAAGGTCTTTTGATTCTTCAAAGAGGACGAAT  
 GATGCTAATGAAATCAGTGAGCAAACAGATATTCATAGTAATAACGACAATAGTAAGAGAATAAAGAATAAAAAAT  
 GTTATTCATTTAATTATCAACAAAATTGCAATGTTGTTAAGTGATTATACCAAGAATTGTAAAAAGCAAAAATAAA  
 CTCATCGAAAATCTGATTATTAATAAAGACAATCTCCAAGTATATCAAAAAATCTTGAGGAGAATAAGGTAAACG  
 ACTAGCGCCGATTCAAATTATTCCATTAATAACGATTTTCTGGCATATCTGCAGAGCAGTTGATTAAATTAAT  
 CACGAGTTGAGTAAATTTTCAAGATCTCTGATAAAAACGATTTTATGAACAGAGGAAAAATAGCACAGTTTCT  
 AATGGAGTTTTAGGCGCAGCAGCTCCTGTTGATAGCGACGCAAATTCGGATACTTTCGGTTTAAACAAAGGAGAAT  
 TTCAACGAAGTTTTTGAAGCTATTCTGAGCCCGGAATTTATGGCCATGGAGGCCCCGGGGATCCGTATGGCTTTG  
 GAGGGATTGCGGAAAAAATATAAAACAAGGCAGGAATTGGTCAAAGCACTCACTCCTAAAAGACGGTCCATTAC  
 TTGAACTCCAATGGTCACTCCAACGGAACCTCCTGTTCAAACGCAGATGTTTTGGCTCATATTAAGCATTTCCCTG  
 TCATTGGCGGCTAATTCATTAGAGCAACATCAACAGCCTATTTCAATCGTCTTTTCAAAACAAAAAAAAAAAAAGGC  
 GATACAAGCAGTCCTGACATTCACACAACATTGGACTTCCCTTTGAATGGCCCCGCATCTATGCACTCATCAGTTC  
 AAGTTGAAAAGATGCGCAATCCTTTTAACTTATTGAAAGTCGTTATGGAAAAATTACCGCTAGGTAAAAACACT  
 ACAGTGAGAGATATCTTCTACTCCAACGTGGAATTGTTTCAAAGACAAGCAAACGTAAGTCCAGTGGCTGGACGTT  
 ATACGCTTTAATTTCAAGCTCTCTCCAAGAAAATCCTTAAACATTATACCAGCTCAAAGGGTTAGTTTATTTCG  
 CCTTTCCCCATTGATATTTATGACAATATTCTGACATGTGAAAATGAACCAAAGATGCAAAAGCAAACAATTTTC  
 CTTGTAAGCCCTCTTAATTTCCATTTTCCAAAGATGATGCGGTCATCAAGTTAGGGACAACAAGTATGTGTAAT  
 ATTGTAATAGTGGAAAAAGAAGCTGTCTTCAACAAATAGTAATAATTATCACAAAGTTAGTACAAATACCATG  
 CTCATTACAGGTAAGGGATTTCCAGATTTCTTGACAAGGTTATTCTTAAAAAACTAGAACAATATTGCTCCAAA  
 TTGATATCGGACTGTTCTATATTTACCGATGCGGACCCCTATGGGATTAGCATAGCCCTAAATTTATACTCACTCG  
 AATGAACGCAACGCTTATATTTGCACGATGGCAAACATAAAGGAATTCGTATTACGCAAGTTTTGGCACAAAAT  
 AATGAAGTGCATAACAAATCCATTCAATTATTGAGTTTGAATCAGCGCGACTACTCCTTAGCCAAGAATTTGATA  
 GCATCTCTGACTGCCAACAGCTGGGATATTGCAACTTACCATTAAAGAACGTCATCATAGAATGTCAGCGGGAA  
 ATTTTTTTTCCAAAAGAAAGCTGAAATGAACGAGATTGATGCCAGAATTTTTGAATACAAATGA

### Sequence of the *MTW1-SPO11* construct (pMLM023 plasmid).

ATGGATATTCGTGGTAGAAAAATGAAAAACCGCCTGCATGCGTGCAGTGCCGTAAGAGGAAGATAGGCTGCGAT  
 CGTGTTAAGCCGATTTGTGGGAAGCTGATGAAGCATAATAAAATGGACTGCTTTTATCCGGACGTTCCCGGACAA  
 TACGTTCCCTCTAGTTCTTCTCTTCCAATACACGCCAAGTAGCCAACGGTCCGTACTTAACTCTTATTACGCT  
 TCTCGTCGTGTCTCCAAGGAACTGCTGCACCTTTTGCAAAAAATCCAGAAGTGGCTTCTTTGGAGCAAAATAAGA  
 GAATACAACACGCGTCTGCAACTGCTCAATGCTCAAAATCAACTTAATAATAGATCATCTGCGGCAAAATGCAACC  
 TTGAATCAACAACACACTCAATATATTCCAAAATCAGTGCCTTCCTTGAAAAGTAAGCCAGTCACTTCTGCAAAAC  
 GAATCTTCTACTCCACTCAATTGGGTTCAAGGCCCTGCAATTTTTTCATATGCTAACCTCTCCTTACACACAAGAT  
 GAAATCATCAATCATGAAATGAATTTCTTGAAAGGCAGACTACTGGAATTGCAAGAAATTACAGGTAAGAAAAAT  
 ACGGGAGTAAATCTTGATCTCAAGCAGGATTCCTCAGCGCAAATGCAGTCTTCACACTCCAATAGAAACCAAGAG  
 GAGTTTTTGAACAATTAAGAAAAGAAAAGTGAAGTGAAGACGGCGTTACGGACGGGGACGGTAAGCCAATTCAGAG  
 AGTGAAAGAAGACCTCATCTTAATGAATTTAAGGATTTAGATCCTCAATTTTTGGATACTAATAAAGTTTTTAAT  
 GTGTTTAATTCTGCTATTTTCAAGAAGGTAGAAACAGATTATGGCTGTTACCAAAAAATATAAATAAAGTTCT  
 ATCTTCCAGATTCAAGTATTTGATTGAACGTGATCCTTTCTATTCAAATTCCTTCAATGACTTGAATATATTAATT  
 GAAACGCAATTTAATGGACCTTTGCACGATTTGGTAGCAAGCCGTAACAGTATTGAGCGCAACAGTGGCATATCT  
 CAAATATTAAAGTTTCTTCCAAATCGATAACACAGACCCTTATCAACAAATACTTATCCACGATAACGGAAACG  
 AATTCATACTTCCAATATTAATAACCAAGAGACTATTACCCATAGTTGAGCAGCTTTTCTTCTTAACACCATT  
 AATAAGCCAAATTTAAAGATTTTGAAGTATTTTCAAGTTTATAGTGTGACCAATGATCAGCTACTAAATCTA  
 GGATTTATTACTCTGTCTCTGATTCTTTTGAATCTGTAATTTCTACGGTTTGTATTCTCTTAGAGATGAT  
 GAACACTTGCAATTATTAATGTGTTATTCAACTACTTGCTTTGTTGAAGTCTAATTTAAACAACGCTTAGATTT  
 GAAATTGAAAAAAGGTCAATGTGTAATATAGAGACCCTGCGGTTTATTTCTTTGTGGAAATATTACCAATTTGTG  
 ATGGACACGTCGTCATCGTCCTCTTTTCGTAATTGATTACGACGAAGATATGCATATGGCATGTTTACTATCGTTA  
 AATCATGAAACTCAAAATCAATCTCATATTTTGACCTGGAATTTTCATATTTAAGAACTACTGCTGGAGACACCTT  
 TTCTTAGGTCAATTGCCGTTGCTAATGTCTGAACCTTTACAAAATTCTACCCCAATTATTGATCCTTTGTTGAAC  
 AACGATTTTGAATTGATTGATTTTGAAGTAACTTGATGAAATATTTGCAAAGTAAAGATCAACAACATATCCATT  
 GATAAAATTATACAGTTAATCAAGCTTTTGAAAAATAAGAATATCGAGGTCAGCCAAGGATGTTTAACGACTCCT

TCAATAATTAATAATATCATGGATTCTCTAATCTACAGGAATTCAATGTTATATTTGAACTTTTACCTCTTATTG  
 CAATTTGAAACATTGAAAAATTATGCTAAATTTAACGAAATTTTGGAAAGACTTTTGGAAATTGTCGAGGGAGACC  
 TTGTTCTTTGTTTTCTCGAAGCTTAGCCAATATTAAATTTGCTGGTCATGAATTCACATTCATCAATAAATCTATT  
 GTGGTTCTGCAAACCTTTAGTTTTAATGCTTTTGGCGCTCTATCAAAGGTCTTTTGATTCTTCAAAGAGGACGAAT  
 GATGCTAATGAAATCAGTGAGCAAACAGATATTCATAGTAATAACGACAATAGTAAGAGAATAAAGAATAAAAAAT  
 GTTATTTCATTTAATTATCAACAAAATTGCAATGTTGTTAAGTGATTATACCAAGAATTGTAAAAAGCAAAATAAA  
 CTCATCGAAAATCTGATTATTAAATTAAGACAATCTCCAAGTATATCAAAAATCTTGAGGAGAATAAGGTAACG  
 ACTAGCGCCGATTCAAATTATTCCATTAATAACGGATTTTCTGGCATATCTGCAGAGCAGTTGATTAAATTAAAT  
 CACGAGTTGAGTAAAATTTTCTGATAAAAACGGATTTTATGAACAGAGGAAAAATAGCACAGTTTCT  
 AATGGAGTTTTAGGCGCAGCAGCTCCTGTTGATAGCAGCAAAATTCGGATACTTTCGGTTTAAACAAAGGAGAAT  
 TTCAACGAAGTTTTTGGAGCTATTCTGATAGCCCGGAATTTATGGCCATGGAGGCCCGGGGATCCGTATGGCTTTG  
 GAGGGATTGCGGAAAAATATAAAACAAGGCAGGAATTGGTCAAAGCACTCACTCCTAAAAAGACGGTCCATTAC  
 TTGAACTCCAATGGTCACTCCAACGGAACCTCCTGTTCAAACGCAGATGTTTTGGCTCATATTAAGCATTTCCCTG  
 TCATTGGCGGCTAATTCATTAGAGCAACATCAACAGCCTATTTCAATCGTCTTTCAAAAACAAAAAAGGC  
 GATACAAGCAGTCTGACATTACACAACATTGGACTTCCCTTTGAATGGCCCGCATCTATGCACTCATCAGTTC  
 AAGTTGAAAAGATGCGCAATCCTTTTAACTTATTGAAAGTCGTTATGGAAAAATTACCGCTAGGTAAAAACACT  
 ACAGTGAGAGATATCTTCTACTCCAACGTGGAATTGTTTCAAAGACAAGCAAACGTAGTCCAGTGGCTGGACGTT  
 ATACGCTTTAATTTCAAGCTCTCTCCAAGAAAATCCTTAAACATTATACCAGCTCAAAGGGTTAGTTTATTTCG  
 CCTTTCCCATTTGATATTTATGACAATATTCTGACATGTGAAAATGAACCAAAGATGCAAAAGCAAAACATTTTC  
 CCTGGTAAGCCCTGTCTAATTCCATTTTTCCAAGATGATGCGGTCTCAAGTTAGGGACAACAAGTATGTGTAAT  
 ATTGTAATAGTGGAAGAAGCTGTCTTACCAAATTAGTAAATAATTATCACAAAGTTGAGTACAAATACCATG  
 CTCATTACAGGTAAGGGATTTCCAGATTTCTTGACAAGGTTATTCTTAAAAAACTAGAACAAATATTGCTCCAAA  
 TTGATATCGGACTGTTCTATATTTACCGATGCGGACCCCTATGGGATTAGCATAGCCCTAAATTTACTCACTCG  
 AATGAACGCAACGCTTATATTTGCACGATGGCAAACCTATAAAGGAATTCGTATTACGCAAGTTTTGGCACAAAAT  
 AATGAAGTGCATAACAAATCCATTCAATTATTGAGTTTGAATCAGCGCGACTACTCCTTAGCCAAGAATTTGATA  
 GCATCTCTGACTGCCAACAGCTGGGATATTGCAACTTCACCATTAAAGAACGTCATCATAGAATGTCAGCGGGAA  
 ATTTTTTCCAAAAGAAAGCTGAAATGAACGAGATTGATGCCAGAATTTTTGAATACAAATGA

### Sequence of the *NLS-TALE-SPO11* construct (pML060 plasmid).

ATGGGAAAACCTATTTCCTAATCCTCTGCTGGGCCTGGATTCTACCGGAGGCATGGCCCCCTAAGAAAAAGCGGAAG  
 GTGGACGGCGGAGTGGACCTGAGAACACTGGGATATTCTCAGCAGCAGCAGGAGAAGATCAAGCCCCAAGGTGAGA  
 TCCACAGTGGCCAGCACCACGAAGCCCTGGTGGGACACGGATTTACACACGCCACATTGTGGCCCTGTCTCAG  
 CACCCTGCCGCCCTGGGAACAGTGGCCGTGAAATATCAGGATATGATTGCCGCCCTGCCTGAGGGCCACACACGAA  
 GCCATTGTGGGAGTGGGAAAACAGTGGTCTGGAGCCAGAGCCCTGGAAGCCCTGCTGACAGTGGCCGGAGAAGT  
 AGAGGACCTCCTCTGAGAGTTGGATACAGGACAGCTGCTGAAGATTGCCAAAAGGGGCGGAGTGACCGCGGTGGAA  
 GCCGTGCACGCTGGAGAAATGCCCTGACAGGAGCCCTCTGAACCTGACCCCCGAACAGGTGGTGGCCATTGCC  
 AGCAACATCGGCGGCAAGCAGGCCCTGGAACCGTGCAGAGACTGCTGCCCGTGTGTGCCAGGCCCATGGCCCTG  
 ACACCTGAACAGGTGGTGGCTATCGCCTCTAACGGCGGAGGAAAAACAGGCTCTGGAAAACAGTGCAGCGGCTGCTG  
 CCTGTGCTGTGTGAGGCTCACGGCTTGACTCCAGAACAGGTGGTGGCTATTGCTTCCCACGACGGGGGGAAACAG  
 GCCCTGGAACCTGTGCAGCGCCTGCTGCCAGTGTGTGCCAGGCTCACGGACTGACCCCCGAACAGGTGGTGGCC  
 ATTGCCAGCAACAACGGCGGCAAGCAGGCCCTGGAACCGTGCAGAGACTGCTGCCCGTGTGTGCCAGGCCCAT  
 GGCCTGACACCTGAACAGGTGGTGGCTATCGCCTCTAACACGGAGGAAAAACAGGCTCTGGAAAACAGTGCAGCGG  
 CTGCTGCCTGTGCTGTGTGAGGCTCACGGCTTGACTCCAGAACAGGTGGTGGCTATTGCTTCCAACAACGGGGG  
 AAACAGGCCCTGGAACCTGTGCAGCGCCTGCTGCCAGTGTGTGCCAGGCTCACGGGCTGACCCCCGAACAGGTG  
 GTGGCCATTGCCAGCAACAACGGCGGCAAGCAGGCCCTGGAACCGTGCAGAGACTGCTGCCCGTGTGTGCCAG  
 GCCCATGGCCTGACACCTGAACAGGTGGTGGCTATCGCCTCTCACGACGGAGGAAAAACAGGCTCTGGAAAACAGT  
 CAGCGGCTGCTGCCTGTGCTGTGTGAGGCTCACGGCTTGACTCCAGAACAGGTGGTGGCTATTGCTTCCAACAAC  
 GGGGGGAAACAGGCCCTGGAACCTGTGCAGCGCCTGCTGCCAGTGTGTGCCAGGCTCACGGTTTGACCCCCGAA  
 CAGGTGGTGGCCATTGCCAGCAACAACGGCGGCAAGCAGGCCCTGGAACCGTGCAGAGACTGCTGCCCGTGTGTG  
 TGCCAGGCCCATGGCCTGACACCTGAACAGGTGGTGGCTATCGCCTCTAATATCGGAGGAAAAACAGGCTCTGGAA  
 ACAGTGCAGCGGCTGCTGCCTGTGCTGTGTGAGGCTCACGGCTTGACTCCAGAACAGGTGGTGGCTATTGCTTCC  
 AACGGCGGGGGGAAACAGGCCCTGGAACCTGTGCAGCGCCTGCTGCCAGTGTGTGCCAGGCTCACGGCCTCACT  
 CCCGAACAGGTGGTGGCCATTGCCAGCCACGAGCGGCAAGCAGGCCCTGGAACCGTGCAGAGACTGCTGCCCC  
 GTGCTGTGCCAGGCCCATGGCCTGACACCTGAACAGGTGGTGGCTATCGCCTCTAATATCGGAGGAAAAACAGGCT  
 CTGGAACAGTGCAGCGGCTGCTGCCTGTGCTGTGTGAGGCTCACGGCTTGACTCCAGAACAGGTGGTGGCTATT  
 GCTTCCCACGACGGGGGAAACAGGCCCTGGAACCTGTGCAGCGCCTGCTGCCAGTGTGTGCCAGGCTCACGGA  
 CTGACCCCCGAACAGGTGGTGGCCATTGCCAGCAACGGCGGCGGCAAGCAGGCCCTGGAACCGTGCAGAGACTG  
 CTGCCCGTGTGTGCCAGGCCCATGGCCTGACACCTGAACAGGTGGTGGCTATCGCCTCTCACGACGGAGGAAAA  
 CAAGCACTCGAGACAGTGCAGCGGCTGCTGCCTGTGCTGTGTGAGGCTCACGGCTTGACTCCAGAACAGGTGGTG  
 GCTATTGCTTCCCACGACGGGGGAAACAGGCCCTGGAACCTGTGCAGCGCCTGCTGCCAGTGTGTGCCAGGCT

**Sequence of the QQR-SPO11 construct (pAP119 plasmid).**

**Sequence of the NLS-dCAS9-SPO11-6xHis-3xFlag construct (pAS504 plasmid).**

6

GACCGGCATTCCATCAAGAAAAATCTGATCGGAGCTCTCCTCTTTGATTTCAGGGGAGACCGCTGAAGCAACCCGC  
CTCAAGCGGACTGCTAGACGGCGGTACACCAGGAGGAAGAACCGGATTTGTTACCTTCAAGAGATATTCTCCAAC  
GAAATGGCAAAGGTCGACGACAGCTTCTTCCATAGGCTGGAAGAATCATTCTCTGTTGGAAGAGGATAAGAAGCAT  
GAACGGCATCCCATTCTCGGTAATATCGTCGACGAGGTGGCCTATCACGAGAAATACCCAACCATCTACCATTCTT  
CGAAAAAGCTGGTGGACTCAACCGACAAGGCAGACCTCCGGCTTATCTACCTGGCCCTGGCCACATGATCAAG  
TTCAGAGGCCACTTCTGATCGAGGGCGACCTCAATCCTGACAATAGCGATGTGGATAAACTGTTTCATCCAGCTG  
GTGCAGACTTACAACCAGCTCTTTGAAGAGAACCCCATCAATGCAAGCGGAGTCGATGCCAAGGCCATTCTGTCA  
GCCCCGGCTGTCAAAGAGCCGACAGACTTGAGAATCTTATCGCTCAGCTGCCGGGTGAAAAGAAAAATGGACTGTTT  
GGAAACCTGATTGCTCTTTTCACTTGGGCTGACTCCCAATTTCAAGTCTAATTTGACCTGGCAGAGGATGCCAAG  
GTGCAACTGTCCAAGGACACCTATGATGACGATCTCGACAACCTCCTGGCCAGATCGGTGACCAATACGCCGAC  
CTTTTCTTGGCTGCTAAGAATCTTTCTGACGCCATCCTGCTGTCTGACATTCTCCGCGTGAACACTGAAATCACC  
AAGGCCCTCTTTTCACTTCAATGATTAAGCGGTATGATGAGCACCACCAGGACCTGACCCTGCTTAAGGCACTC  
GTCCGGCAGCAGCTTCCGGAGAAGTACAAGGAAATCTTCTTTGACCAGTCAAAGAATGGATACGCCGGCTACATC  
GACGGAGGTGCCTCCCAAGAGGAATTTTATAAGTTTATCAAACCTATCCTTGAGAAGATGGACGGCACCAGGAG  
CTCCTCGTGAAACTGAATCGGGAGGATCTGCTGCGGAAGCAGCGCACTTTCGACAATGGGAGCATTTCCACCAG  
ATCCATCTTGGGGAGCTTTCACGCCATCCTTCGGCGCCAAGAGGACTTCTACCCCTTTCTTAAGGACAACAGGGAG  
AAGATTGAGAAAATTTCTACTTTCCGCATCCCCTACTACGTGGGACCCCTCGCCAGAGGAAATAGCCGGTTTGCT  
TGGATGACCAGAAAGTCAGAAGAACTATCACTCCCTGGAACCTTCGAAGAGGTGGTGGACAAGGGAGCCAGCGCT  
CAGTCATTTCATCGAACGGATGACTAAGTTCGATAAGAACCTCCCCAATGAGAAGGTCTCGCCGAAACATTCCCTG  
CTCTACGAGTACTTTACCGTGTACAACGAGCTGACCAAGGTGAAATATGTCAACGAAAGGGATGAGGAAGCCCGCA  
TTCCTGTCAAGGCAACAAAAGAAGGCAATTTGTGGACCTTCTGTTCAAGACCAATAGAAAAGGTGACCGTGAAGCAG  
CTGAAGGAGGACTATTTCAAGAAAATTTGAATGCTTCGACTCTGTGGAGATTAGCGGGGTGCAAGATCGGTTCAAC  
GCAAGCCTGGGTACCTACCATTGATCTGCTTAAGATCATCAAGGACAAGGATTTTCTGGACAATGAGGAGAACGAG  
GACATCCTTGAGGACATTGTCTGACTCTCACTCTGTTTCGAGGACCGGGAAATGATCGAGGAGAGGCTTAAGACC  
TACGCCCATCTGTTTCGACGATAAAGTGATGAAGCAACTTAAACGGAGAAGATATACCGGATGGGGACGCCCTTAGC  
CGCAAACTCATCAACGGAATCCGGGACAAACAGAGCGGAAGACCATTTCTTGATTTCCTTAAGAGCGCAGGATTC  
GCTAATCGCAACTTCACTGCAACTTATCCATGATGATTTCCCTGACCTTTAAGGAGGACATCCGAGAAGCCCAAGTG  
TCTGGACAAGGTGACTCACTGCACGAGCATATCGCAAATCTGGCTGGTTTACCCGCTATTAAGAAGGTATTCTC  
CAGACCGTGAAAGTCGTGGACGAGCTGGTCAAGGTGATGGGTGCGCCATAAACAGAGAACATTGTTCATCGAGATG  
GCCAGGGAAAACAGACTACCCAGAAGGGACAGAAGAACAGCAGGGAGCGGATGAAAAGAATTGAGGAAGGGATT  
AAGGAGCTCGGGTCACAGATCCTTAAAGAGCACCCGGTGGAAAACACCCAGCTTCAGAATGAGAAGCTCTATCTG  
TACTACCTTCAAATGGACGCGATATGTATGTGGACCAAGAGCTTGATATCAACAGGCTCTCAGACTACGACGTG  
GACGCCATCGTCCCTCAGAGCTTCTTCAAAGACGACTCAATTGACAATAAGGTGCTGACTCGCTCAGACAAGAAC  
CGGGGAAAGTCAGATAACGTGCCCTCAGAGGAAGTCGTGAAAAGATGAAGAAGTATTGGCGCCAGCTTCTGAAC  
GCAAAGCTGATCACTCAGCGGAAGTTCGACAATCTCACTAAGGCTGAGAGGGGCGGACTGAGCGAACTGGACAAA  
GCAGGATTCATTAAACGGCAACTTGTGGAGACTCGGCAGATTACTAAACATGTGCCCCAAATCCTTGACTCACGC  
ATGAATACCAAGTACGACGAAAACGACAACTTATCCGCGAGGTGAAGGTGATTACCCTGAAGTCCAAGCTGGTC  
AGCGATTTTCAGAAAGGACTTTCAATTCTACAAAGTGCGGGAGATCAATAACTATCATCATGCTCATGACGCATAT  
CTGAATGCCGTGGTGGGAACCGCCCTGATCAAGAAGTACCCAAAGCTGGAAAGCGAGTTCTGTGACGGAGACTAC  
AAGGTCTACGACGTGCGCAAGATGATTGCCAAATCTGAGCAGGAGATCGGAAAGGCCACCGCAAAGTACTTCTTC  
TACAGCAACATCATGAATTTCTTCAAGACCGAAATCACCTTGCAAACGGTGAGATCCGGAAGAGGCCGCTCATC  
GAGACTAATGGGGAGACTGGCGAAATCGTGTGGGACAAGGGCAGAGATTTCTGCTACCGTGCGCAAAGTGCTTTCT  
ATGCCTCAAGTGAACATCGTGAAGAAAACCGAGGTGCAACCGGAGGCTTTTCTAAGGAATCAATCTCCCCAAG  
CGCAACTCCGACAGCTCATTGCAAGGAAGAGGATTGGGACCCCTAAGAAGTACGGCGGATTCGATTACCAACT  
GTGGCTTATTCTGTCTGCTGCTGAGTGAAGGTGGAAGAAAGGAAAGTCTAAGAAGCTCAAGAGCGTGAAGGAAGT  
CTGGGTATCACCATTATGGAGCGCAGCTCCTTCGAGAAGAACCAATTGACTTTCTCGAAGCCAAAGGTTACAAG  
GAAGTCAAGAAGGACCTTATCATCAAGCTCCCAAAGTATAGCCTGTTTGAAGTGGAGAATGGGCGGAAGCGGATG  
CTCGCTCCGCTGGCGAACTTCAGAAGGGTAATGAGCTGGCTCTCCCTCCAAGTACGTGAATTTCTCTACCTT  
GCAAGCCATTACGAGAAGCTGAAGGGGAGCCCCGAGGACAACGAGCAAAAGCAACTGTTTGTGGAGCAGCATAAG  
CATTATCTGGACGAGATCATTGAGCAGATTTCCGAGTTTCTAAACCGCTCATTCTCGCTGATGCCAACCTCGAT  
AAAGTCCTTAGCGCATACAATAAGCACAGAGACAAACCAATTCGGGAGCAGGCTGAGAATATCATCCACCTGTTT  
ACCCTCACCAATCTTGGTGCCCCCTGCCGATTCAGTACTTTCGACACCACCATCGACCGGAAACGCTATACCTCC  
ACCAAAGAAGTGCTGGACGCCACCCTCATCCACCAGAGCATCACCGGACTTTACGAAACTCGGATTGACCTCTCA  
CAGCTCGGAGGGGATCCGGAATTTATGGCCATGGAGGCCCCGGGGATCCGTATGGCTTTGGAGGGATTGCGGAAA  
AAATATAAAACAAGGCAGGAATTTGGTCAAAGCACTCACTCCTAAAAGACGGTCCATTCACTTGAAGTCCAATGGT  
CACTCCAACGGAACCTCCCTGTTCAAACGCAGATGTTTTGGCTCATATTAAGCATTTCTGTGATTGGCGGCTAAT  
TCATTAGAGCAACATCAACAGCCTATTTCAATCGTCTTTCAAAACAAAAAAGGCGATACAAGCAGTCCCT  
GACATTCACACAACATTGGACTTCCCTTTGAATGGCCCGCATCTATGCACTCATCAGTTCAAGTTGAAAAGATGC  
GCAATCCTTTTAACTTATTGAAAGTCGTTATGGAAAAATTACCGCTAGGTAAAAACACTACAGTGAGAGATATC  
TTCTACTCCAACGTGGAATTGTTTTCAAAGACAAGCAAACGTAGTCCAGTGGCTGGACGTTATACGCTTTAATTTT  
AAGCTCTCTCAAGAAAATCCTTAAACATTATACCAGCTCAAAGGGTTTAGTTTATTTCGCCCTTTCCCATTGAT

ATTTATGACAATATTCTGACATGTGAAAATGAACCAAAGATGCAAAAGCAAACAATTTTCCCTGGTAAGCCCTGT  
CTAATTCCATTTTTTCCAAGATGATGCGGTCATCAAGTTAGGGACAACAAGTATGTGTAATATTGTAATAGTGGAA  
AAAGAAGCTGTCTTCACCAAATTAGTAAATAATTATCACAAAGTTGAGTACAAATACCATGCTCATTACAGGTAAG  
GGATTTCCAGATTTCTTGACAAGGTTATTCCTAAAAAACTAGAACAAATATTGCTCCAAATTGATATCGGACTGT  
TCTATATTTACCGATGCGGACCCCTATGGGATTAGCATAGCCCTAAATTATACTCACTCGAATGAACGCAACGCT  
TATATTTGCACGATGGCAAATATAAAGGAATTCGTATTACGCAAGTTTGGCACAAAATAATGAAGTGCATAAC  
AAATCCATTCAATTATTGAGTTTGAATCAGCGCGACTACTCCTTAGCCAAGAATTTGATAGCATCTCTGACTGCC  
AACAGCTGGGATATTGCAACTTCACCATTAAAGAACGTCATCATAGAATGTCAGCGGGAAATTTTTTCCAAAAG  
AAAGCTGAAATGAACGAGATTGATGCCAGAATTTTTGAATACAAATCCCACCACCATCATCATCACGGAGACTAC  
AAGGATGACGATGACAAGGACTACAAGGATGACGATGACAAGGACTACAAGGATGACGATGACAAGTAA



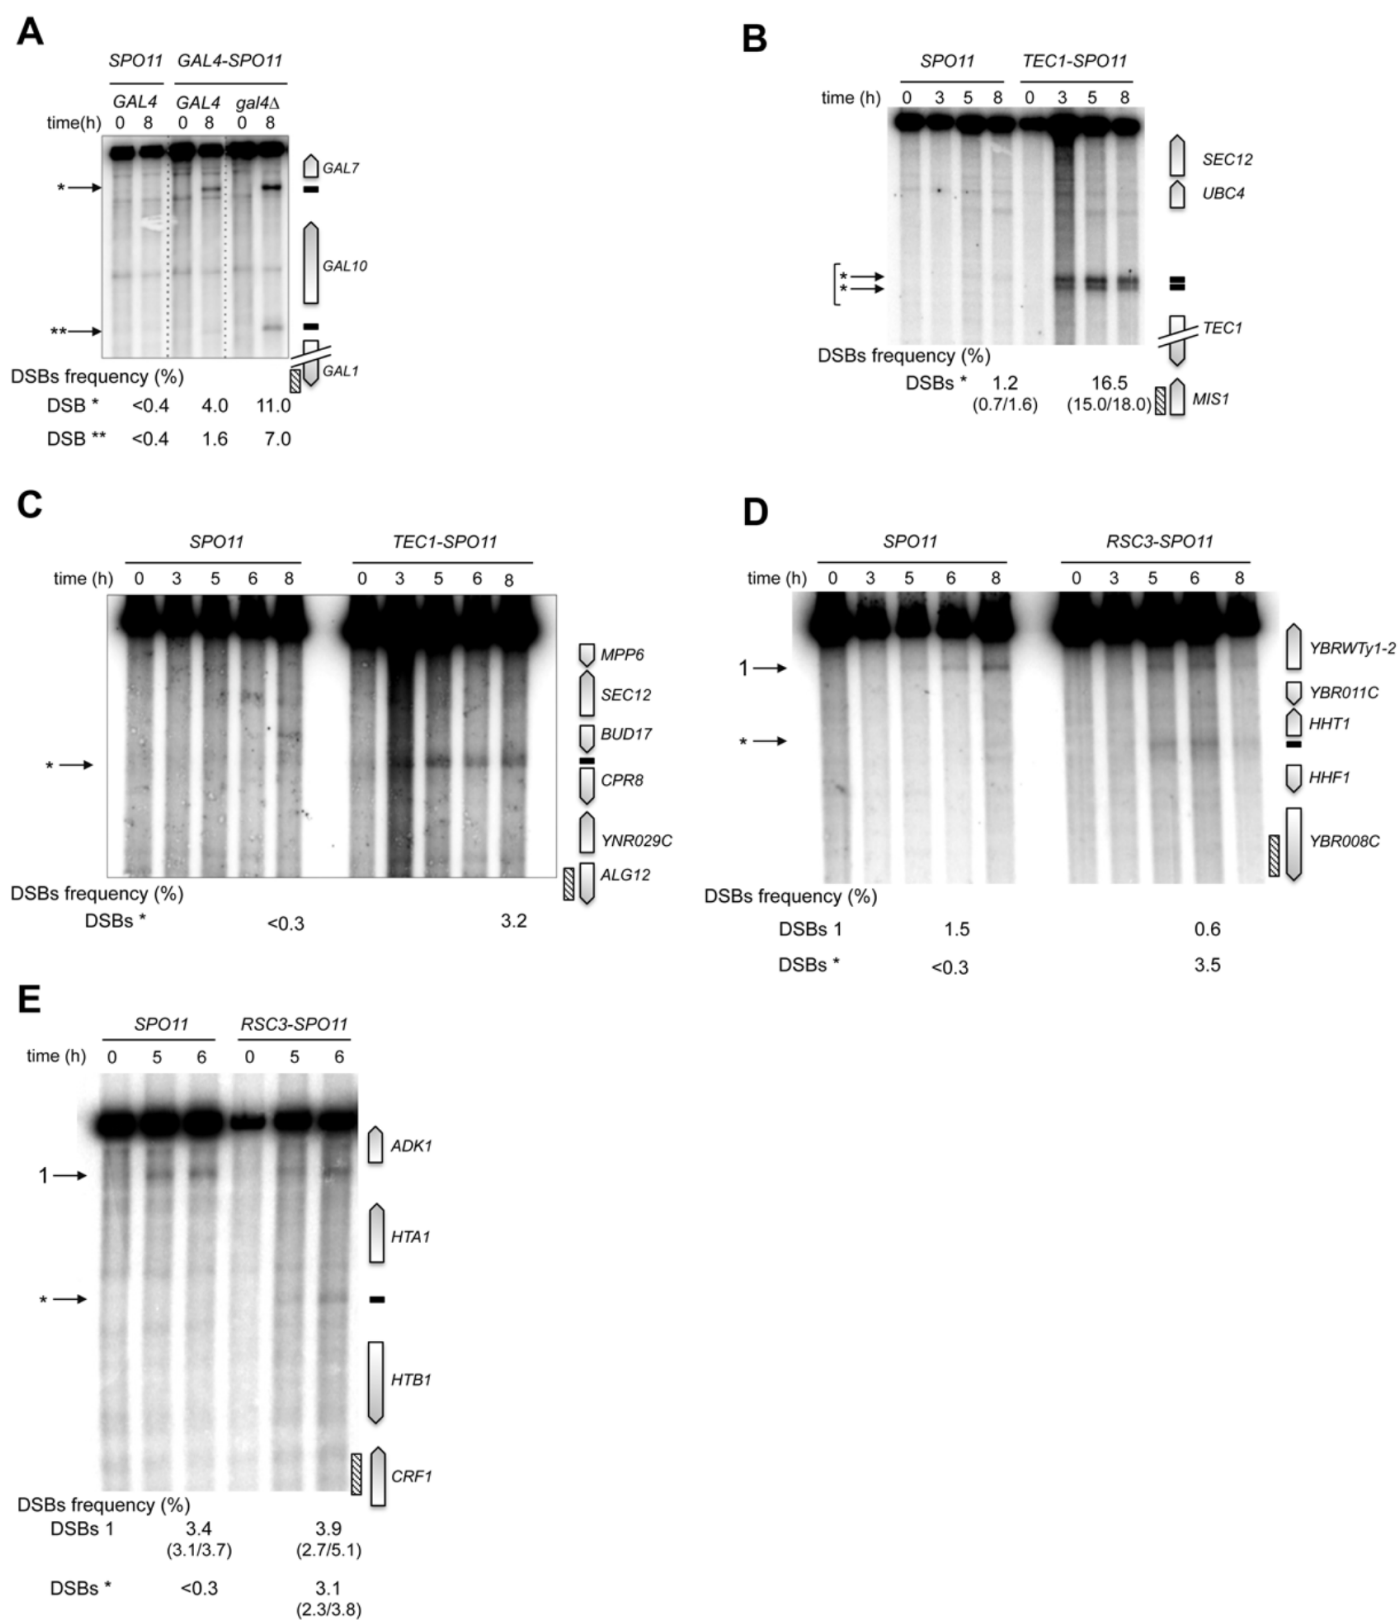

**Figure S2. Gal4-, Tec1- and Rsc3-Spo11 fusions promote DSB formation in targeted DSB-cold promoter-containing regions.**

(A-E) DSB formation was analyzed by Southern Blot at the *GAL7* and *GAL1/GAL10*

promoters targeted by Gal4-Spo11 (**A**), at the *TEC1* (**B**) and *CPR8* (**C**) promoters targeted by Tec1-Spo11, and at the *HHF1/HHT1* (**D**) and *HTA1/HTB1* (**E**) promoters targeted by Rsc3-Spo11. Cells were collected at the indicated time after transfer into sporulation medium (t=0h). TSF target sites and probes are shown as black bars in gene promoter maps and as hatched rectangle in ORF maps, respectively. At the left of the blot, arrowheads indicate wild-type (numbered) and targeted (asterisks) DSBs. DSB values are from single experiments or the mean of two independent experiments with minimum and maximum values indicated into parentheses.

(**A**) genomic DNA was prepared from *SPO11/SPO11 GAL4/GAL4* (ORD7304), *GAL4-SPO11/GAL4-SPO11 spo11Δ/spo11Δ GAL4/GAL4* (AND2096) and *GAL4-SPO11/GAL4-SPO11 spo11Δ/spo11Δ gal4Δ/gal4Δ* (AND1969) diploids, digested with *ClaI* and *AatII* and probed with an internal *GAL1* fragment.

(**B**) genomic DNA was prepared from *SPO11/SPO11* (ORD7304) and *TEC1-SPO11/TEC1-SPO11 spo11Δ/spo11Δ* (AND1926) diploids, digested with *EcoRV* and probed with an internal *MIS1* fragment.

(**C**) genomic DNA was prepared from *SPO11/SPO11* (ORD7304) and *TEC1-SPO11/TEC1-SPO11 spo11Δ/spo11Δ* (AND1926) diploids, digested with *HpaI* and *XbaI* and probed with an internal *ALG12* fragment.

(**D**) genomic DNA was prepared from *SPO11/SPO11* (ORD7304) and *RSC3-SPO11/RSC3-SPO11 spo11Δ/spo11Δ* (AND2006) diploids, digested with *EcoRI* and *HpaI* and probed with an internal *YBR008C* fragment.

(**E**) genomic DNA was prepared *SPO11/SPO11* (ORD7304) and *RSC3-SPO11/RSC3-SPO11 spo11Δ/spo11Δ* (AND2006) diploids, digested with *AatII* and probed with an internal *CRF1* fragment.

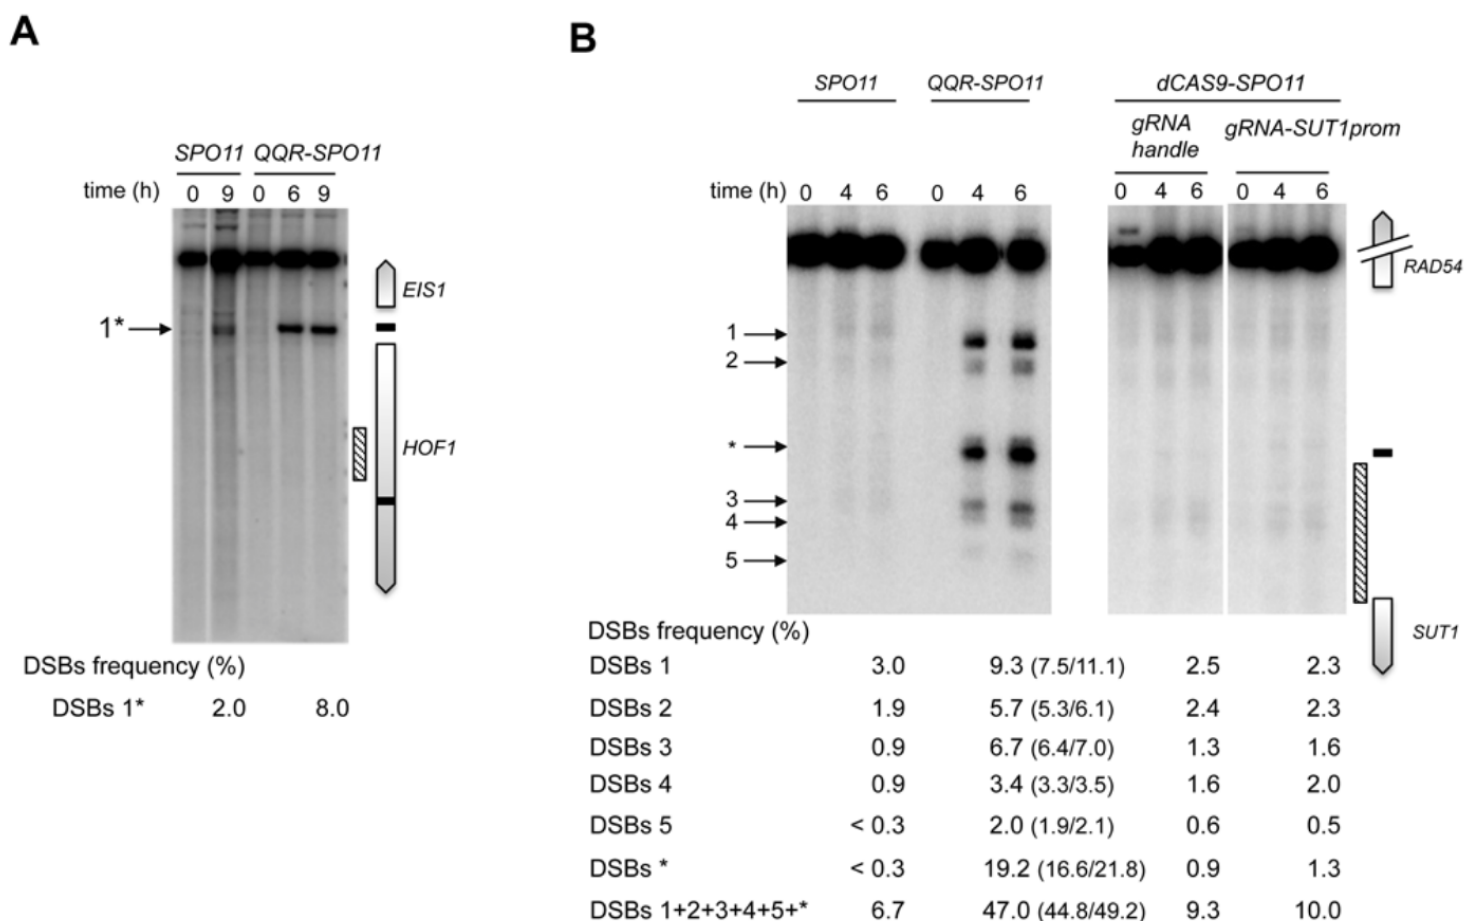

**Figure S3. QQR-Spo11 triggers DSB formation in DSB-cold QQR recognition site-containing regions.**

**(A-B)** Southern blot analysis of DSBs targeted by QQR-Spo11 at the *EIS1/HOF1* (**A**) and *RAD54/SUT1* (**B**) promoters. Cells were collected at the indicated time after transfer into sporulation medium (t=0h). QQR target sites and probes are shown as black bars in gene promoter maps and as hatched rectangle in ORF maps, respectively. At the left of the blot, arrowheads indicate wild-type (numbered) and targeted (asterisks) DSBs. DSB values are from single experiments or the mean of two independent experiments with minimum and maximum values indicated into parentheses.

**(A)** genomic DNA was prepared from *SPO11/SPO11* (ORD7239) and *QQR-SPO11/QQR-SPO11 spo11Δ/spo11Δ* (ORD8146) diploids, digested with *Xba*I and probed with an internal *HOF1* fragment.

**(B)** DNA was prepared from *SPO11/SPO11* (ORD7239), *QQR-SPO11/QQR-SPO11 spo11Δ/spo11Δ* (ORD8146), *dCAS9-SPO11/0* + gRNA handle *spo11Δ/spo11Δ*

(ANT2527) and *dCAS9-SPO11/0* + *gRNA-SUT1prom spo11Δ/spo11Δ* (ANT2709) diploids, digested with *HincII* and probed with an intergenic *RAD54-SUT1* fragment.

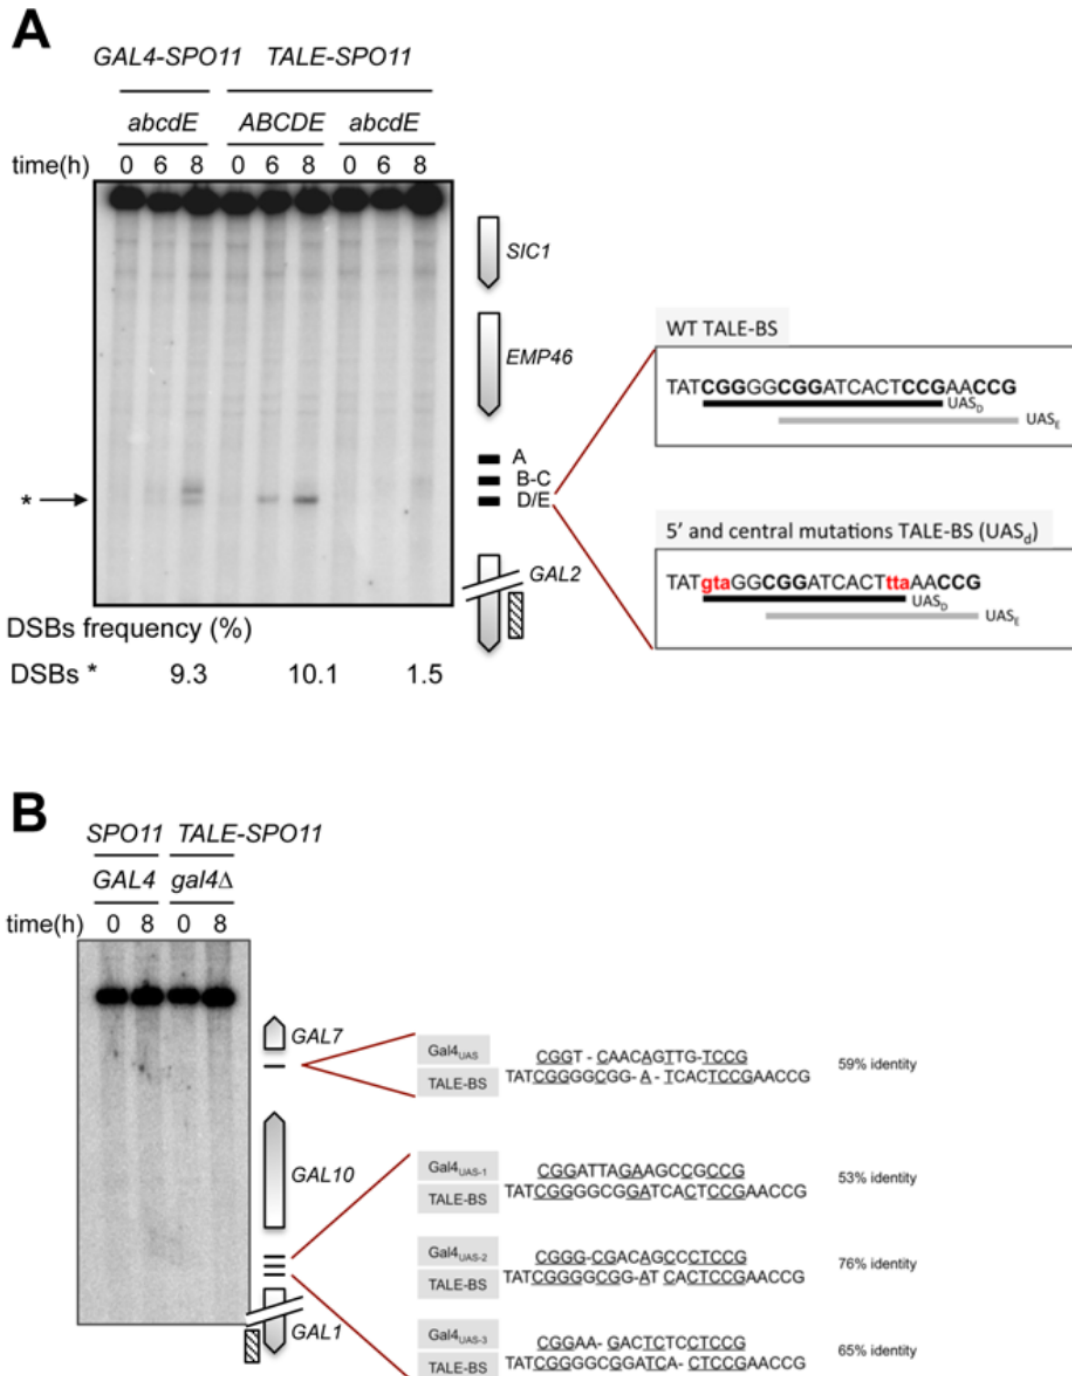

**Figure S4. TALE-Spo11-mediated DSB formation is dependent on the presence of TALE binding sequence.**

(A-B) TALE-Spo11-mediated DSB formation in *gal4Δ* cells was analyzed by Southern blot at the *GAL2* (A) and *GAL1-GAL10-GAL7* (B) regions. Mutations in the TALE binding site abolish TALE-Spo11 DSB formation at the targeted *GAL2* region (A). Mutations introduced in the TALE binding site are indicated in the right panel. From the top to the bottom, the wild-type sequence of TALE binding site (TALE-BS, 25 nt) overlapping Gal<sub>UAS-D</sub> and Gal<sub>UAS-E</sub> and the TALE binding site with 5' and

central mutations are shown. TALE-Spo11 fusion does not induce DSB formation in the untargeted Gal4<sub>UAS</sub>-containing *GAL1-GAL10-GAL7* region (**B**). This region contains several Gal4<sub>UAS</sub> sites in gene promoters as indicated in the right panel. It is efficiently targeted by Gal4BD- and Gal4-Spo11 (Ref. (25) and **Supplementary Fig. 2A**). Cells were collected at the indicated time after transfer into sporulation medium (t=0h). Gal4<sub>UAS</sub> sites and probes are shown as black bars in gene promoter maps and as hatched rectangle in ORF maps, respectively. At the left of the blot, arrowheads indicate targeted DSBs (asterisks).

**(A)** genomic DNA was prepared from *GAL4-SPO11/GAL4-SPO11 spo11Δ/spo11Δ gal4Δ/gal4Δ UAS<sub>abcdE</sub>* (AND3019), *TALE-SPO11/TALE-SPO11 spo11Δ/spo11Δ gal4Δ/gal4Δ* (AND2540) and *TALE-SPO11/TALE-SPO11 spo11Δ/spo11Δ gal4Δ/gal4Δ UAS<sub>abcdE</sub>* (AND3010) diploids, digested with *Xba*I and probed with an internal *GAL2* fragment.

**(B)** genomic DNA was prepared from *SPO11/SPO11 GAL4/GAL4* (ORD7304) and *TALE-SPO11/TALE-SPO11 spo11Δ/spo11Δ gal4Δ/gal4Δ* (AND2540) diploids, digested with *Cla*I and *Aat*II and probed with an internal *GAL1* fragment.

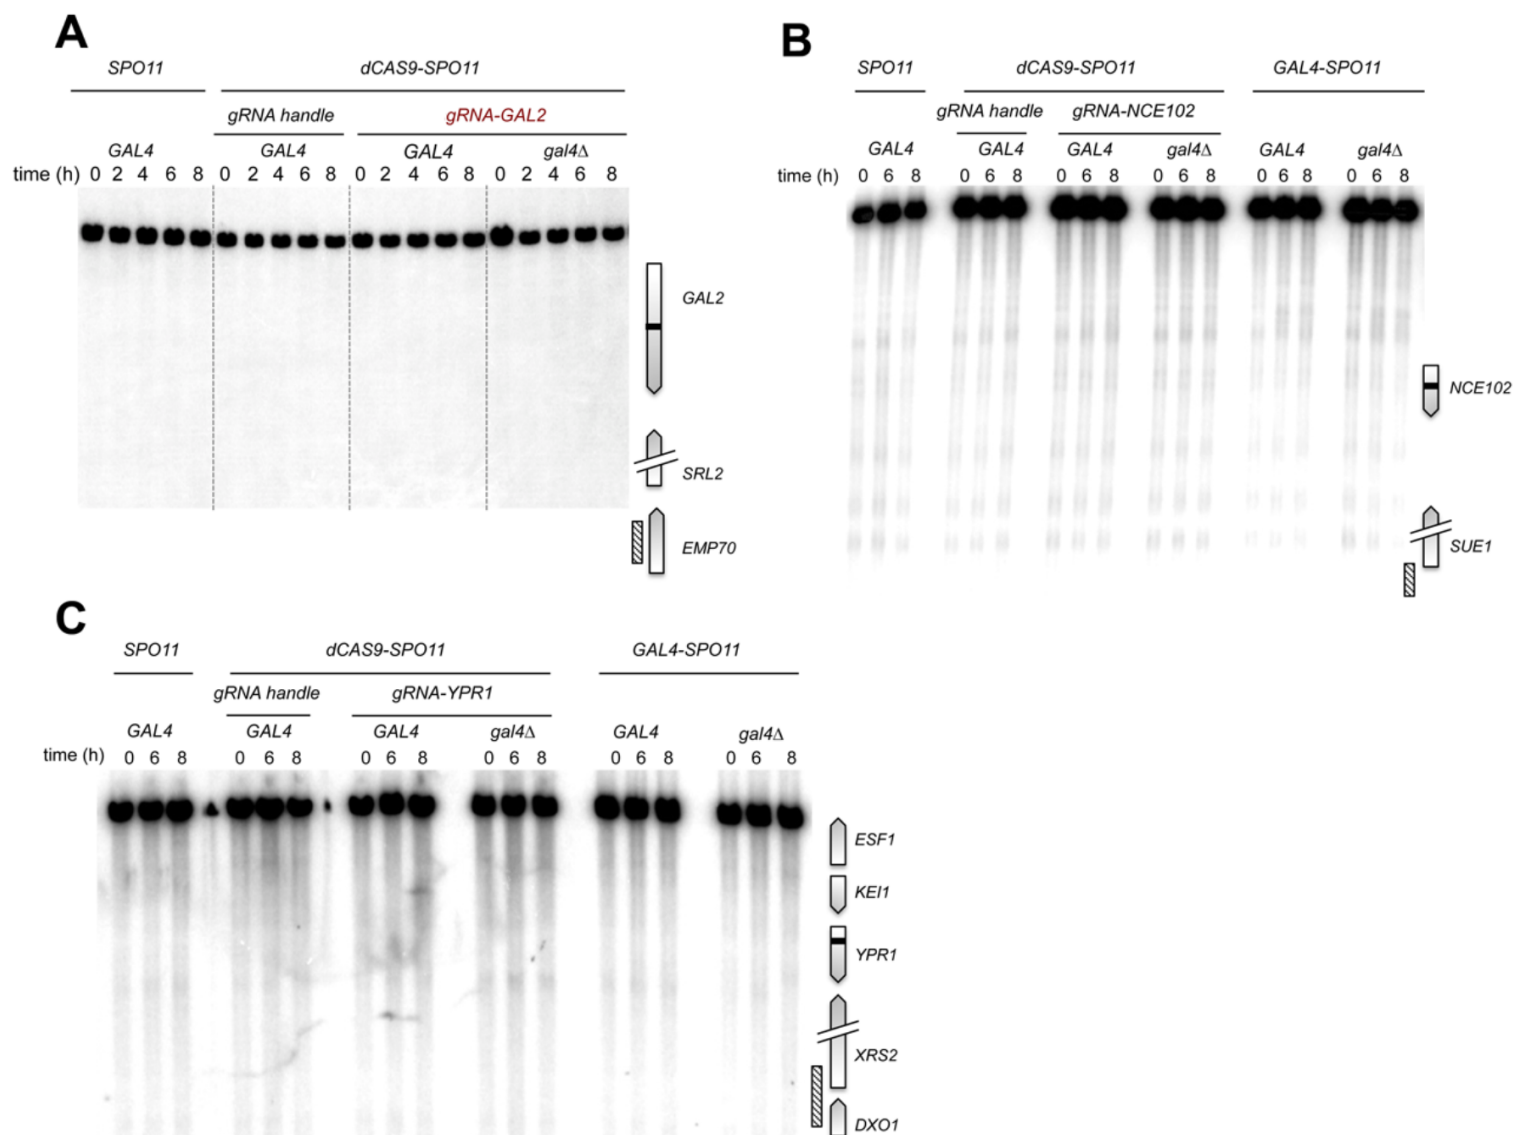

**Figure S5. Targeting of DSB-cold gene coding sequences by Gal4-Spo11 and CRISPR-dCas9-Spo11.**

(A-C) DSB formation was analyzed by Southern Blot at the targeted *GAL2* (A), *NCE102* (B) and *YPR1* (C) ORFs. Cells were collected at the indicated time after transfer into sporulation medium (t=0h). TSF target sites and probes are shown as black bars as hatched rectangles in gene ORF maps, respectively.

(A) genomic DNA was prepared from *SPO11/SPO11 GAL4/GAL4* (ORD7304), *dCAS9-SPO11/0 + gRNA-handle spo11Δ/spo11Δ* (ANT2527), *dCAS9-SPO11/0 + gRNA-GAL2 spo11Δ/spo11Δ GAL4/GAL4* (ANT2595) and *dCAS9-SPO11/0 + gRNA-GAL2 spo11Δ/spo11Δ gal4Δ/gal4Δ* (ANT2596) diploids, digested with *Afl*III and *Pvu*I and probed with an internal *EMP70* fragment.

(B) genomic DNA was prepared from *SPO11/SPO11 GAL4/GAL4* (ORD7304), *dCAS9-SPO11/0 + gRNA-handle spo11Δ/spo11Δ* (ANT2527), *dCAS9-SPO11/0 + gRNA-NCE102 spo11Δ/spo11Δ GAL4/GAL4* (ANT2549), *dCAS9-SPO11/0 + gRNA-NCE102 spo11Δ/spo11Δ gal4Δ/gal4Δ* (ANT2555), *GAL4-SPO11/GAL4-SPO11 spo11Δ/spo11Δ GAL4/GAL4* (AND2096) and *GAL4-SPO11/GAL4-SPO11 spo11Δ/spo11Δ gal4Δ/gal4Δ* (AND1969) diploids, digested with *SaI* and *PstI* and probed with an internal *URN1* fragment.

(C) genomic DNA was prepared from *SPO11/SPO11 GAL4/GAL4* (ORD7304), *dCAS9-SPO11/0 + gRNA-handle spo11Δ/spo11Δ* (ANT2527), *dCAS9-SPO11/0 + gRNA-YPR1 spo11Δ/spo11Δ GAL4/GAL4* (ANT2548), *dCAS9-SPO11/0 + gRNA-YPR1 spo11Δ/spo11Δ gal4Δ/gal4Δ* (ANT2554), *GAL4-SPO11/GAL4-SPO11 spo11Δ/spo11Δ GAL4/GAL4* (AND2096) and *GAL4-SPO11/GAL4-SPO11 spo11Δ/spo11Δ gal4Δ/gal4Δ* (AND1969) diploids, digested with *AgeI* and *PacI* and probed with an internal *DXO1* fragment.



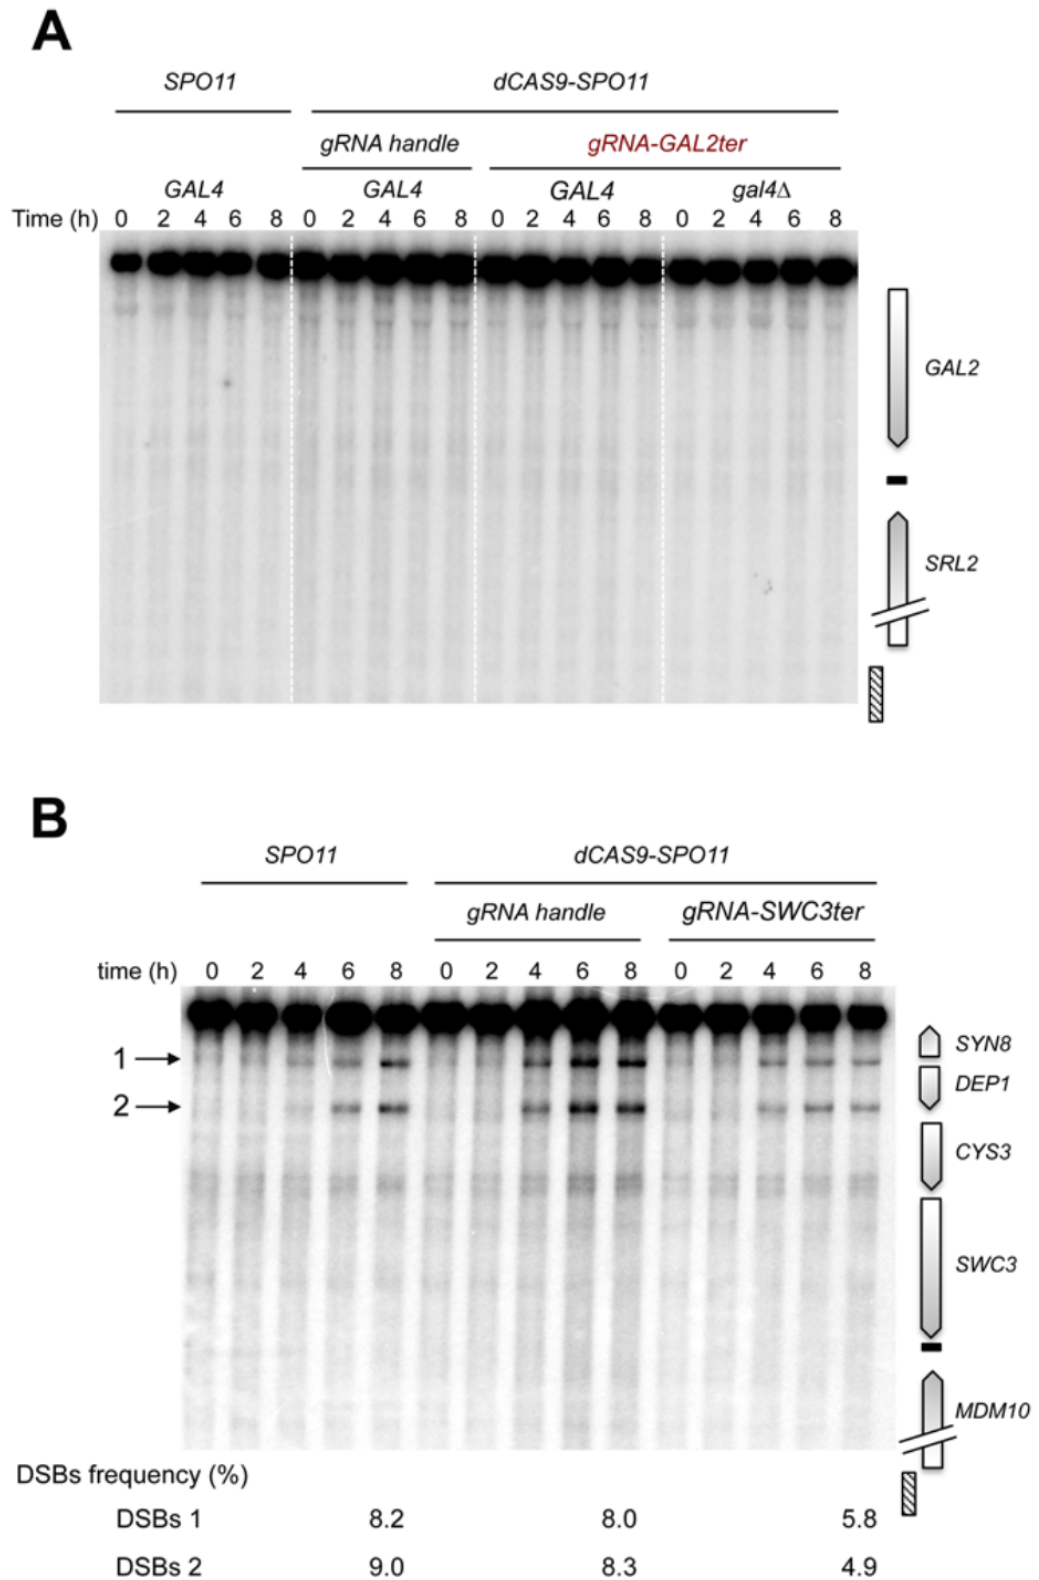

**Figure S6. CRISPR-dCas9-Spo11 does not trigger DSBs in targeted gene terminator-containing regions.**

Southern blot analysis of CRISPR-dCas9-Spo11 DSBs at the targeted *GAL2* (**A**) and *SWC3* terminator regions (**B**). Diploid cells were collected at the indicated time after transfer into sporulation medium (t=0h). CRISPR-dCas9-Spo11 target sites are shown as black bars. At the left of the gel, arrowheads indicate wild-type (numbered) and targeted (asterisks) DSBs.

(**A**) genomic DNA was prepared from *SPO11/SPO11 GAL4/GAL4* (ORD7304), *dCAS9-SPO11/0* + gRNA-handle *spo11Δ/spo11Δ* (ANT2527), *dCAS9-SPO11/0* + gRNA-*GAL2ter spo11Δ/spo11Δ* (ANT2567) and *dCAS9-SPO11/0* + gRNA-*GAL2ter spo11Δ/spo11Δ gal4Δ/gal4Δ* (ANT2568) diploids, digested with *Afl*III and *Pvu*I and probed with an internal *EMP70* fragment.

(**B**) genomic DNA was prepared from *SPO11/SPO11* (ORD7304), *dCAS9-SPO11/0* + gRNA-handle *spo11Δ/spo11Δ* (ANT2527) and *dCAS9-SPO11/0* + gRNA-*SWC3ter spo11Δ/spo11Δ* (ANT2597) diploids, digested with *Pac*I and *Avr*II and probed with an internal *SPO7* fragment.

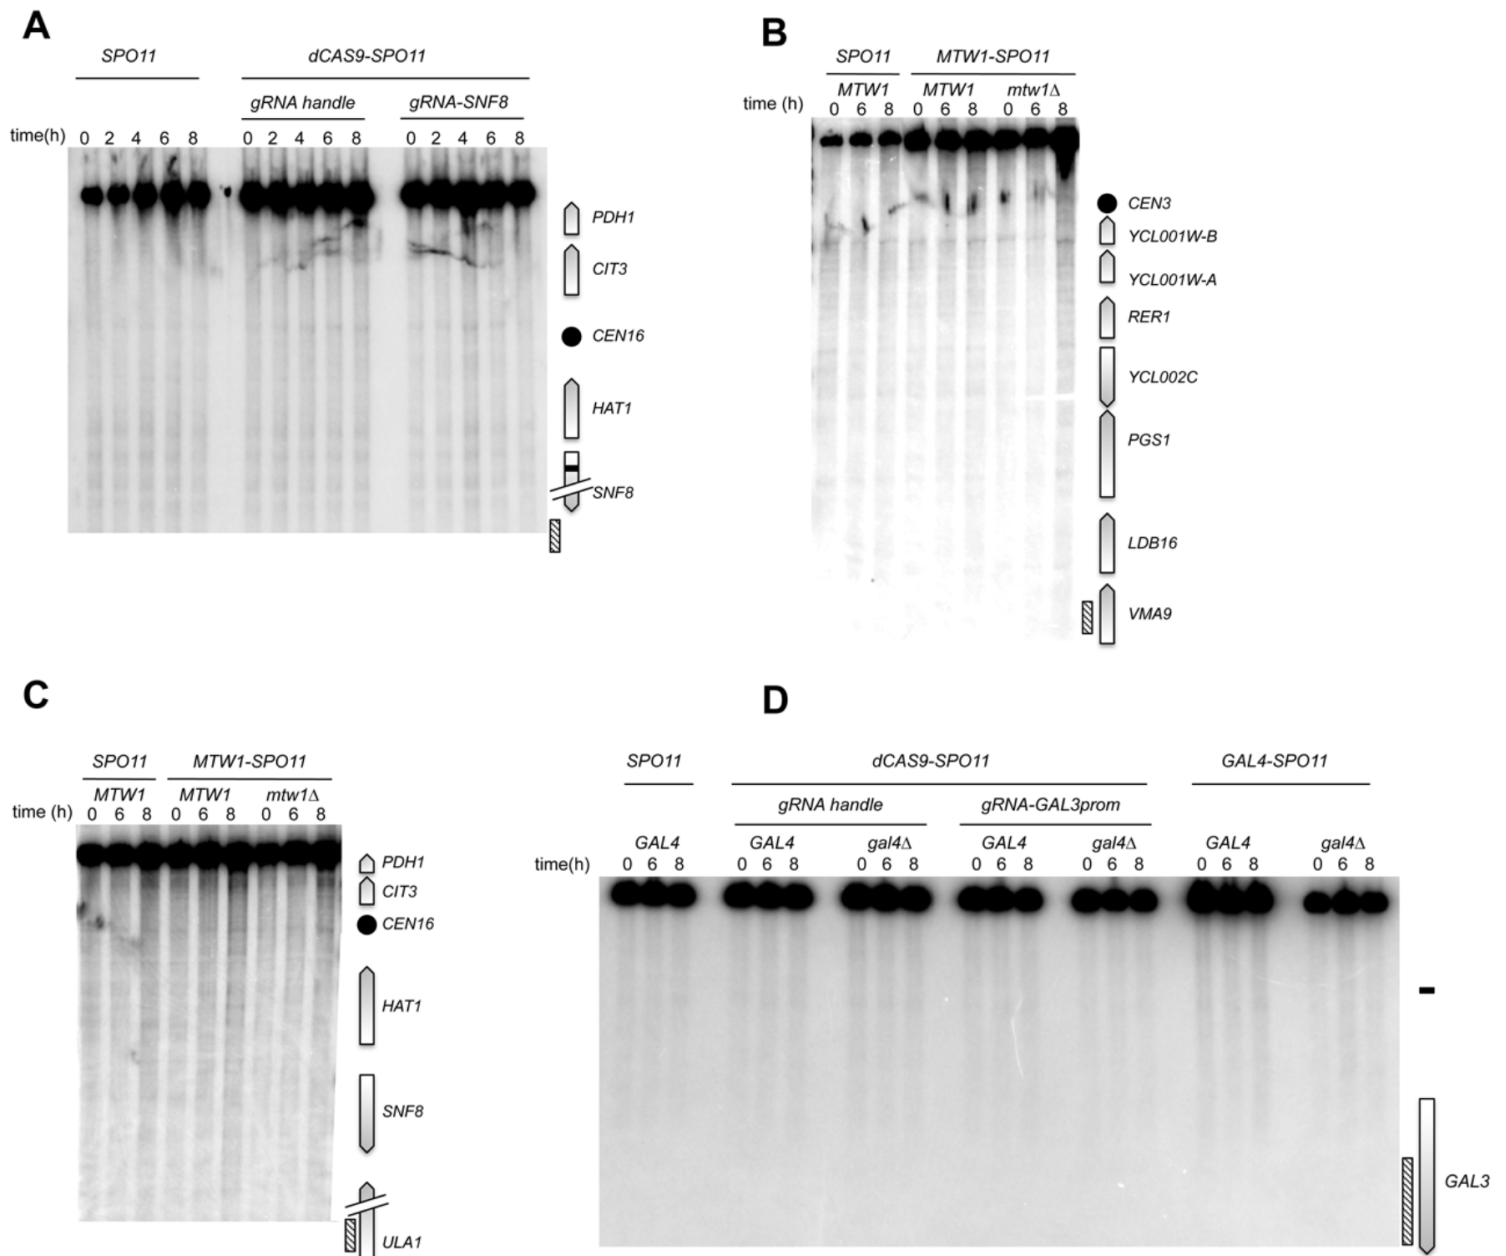

**Figure S7. TSFs do not stimulate meiotic DSB formation in the targeted pericentric regions.**

(A-D) Analysis of TSF DSB formation in pericentric regions by Southern Blot. Regions containing the centromere of chromosomes III (*CEN3*) and XVI (*CEN16*) were targeted by CRISPR-dCas9-Spo11 (A) and Mtw1-Spo11 (B-C). Targeting of Mtw1-Spo11 was examined in *MTW1* and *mtw1Δ* cells. The targeting of meiotic DSBs at the pericentric *GAL3* promoter (13 kb to the centromere) by Gal4-Spo11 and CRISPR-dCas9-Spo11 was analyzed in *GAL4* and *gal4Δ* cells (D). Mtw1-Spo11

targets are centromeres; Gal4- and CRISPR-dCas9-Spo11 target sites are shown as black bars. Probes are indicated as hatched rectangle in ORF maps.

(A) genomic DNA was prepared from *SPO11/SPO11* (ORD7304), *dCAS9-SPO11/0* + gRNA-handle *spo11Δ/spo11Δ* (ANT2527) and *dCAS9-SPO11/0* + gRNA-*SNF8 spo11Δ/spo11Δ* (ANT2544) diploids, digested with *SpeI* and probed with a *ULA1* fragment.

(B) genomic DNA was prepared from *SPO11/SPO11 MTW1/MTW1* (ORD7304), *MTW1-SPO11/MTW1-SPO11 spo11Δ/spo11Δ* (AND2304) and *MTW1-SPO11/MTW1-SPO11 spo11Δ/spo11Δ mtw1Δ/mtw1Δ* (AND2582) diploids, digested with *BglII* and probed with an internal *VMA9* fragment.

(C) genomic DNA was prepared from *SPO11/SPO11 MTW1/MTW1* (ORD7304), *MTW1-SPO11/MTW1-SPO11 spo11Δ/spo11Δ* (AND2304) and *MTW1-SPO11/MTW1-SPO11 spo11Δ/spo11Δ mtw1Δ/mtw1Δ* (AND2582) diploids, digested with *SpeI* and probed with an internal *ULA1* fragment

(D) genomic DNA was prepared from *SPO11/SPO11 GAL4/GAL4* (ORD7304), *dCAS9-SPO11/0* + gRNA-handle *spo11Δ/spo11Δ* (ANT2527), *dCAS9-SPO11/0* + gRNA-handle *spo11Δ/spo11Δ gal4Δ/gal4Δ* (ANT2536), *dCAS9-SPO11/0* + gRNA-*GAL3prom spo11Δ/spo11Δ GAL4/GAL4* (ANT2538), *dCAS9-SPO11/0* + gRNA-*GAL3prom spo11Δ/spo11Δ gal4Δ/gal4Δ* (ANT2537), *GAL4-SPO11/GAL4-SPO11 spo11Δ/spo11Δ GAL4/GAL4* (AND2096) and *GAL4-SPO11/GAL4-SPO11 spo11Δ/spo11Δ gal4Δ/gal4Δ* (AND1969) diploids, digested with *PstI* and *XhoI* and probed with an internal *GAL3* fragment.

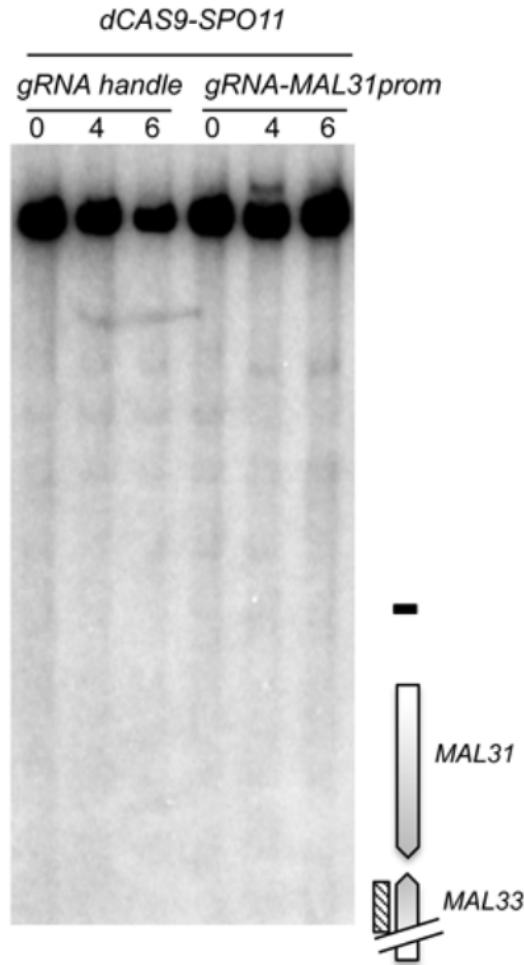

**Figure S8. CRISPR-dCas9-Spo11 does not induce DSB formation at the targeted subtelomeric region.**

DSB formation at the subtelomeric region containing the target *MAL31* gene was analyzed by Southern blot. CRISPR-dCas9-Spo11 target site is shown as a black bar in the *MAL31* promoter. Diploid cells were collected at the indicated time after transfer into sporulation medium (t=0h).

Genomic DNA was prepared from *dCAS9-SPO11/0* + gRNA-handle *spo11Δ/spo11Δ* (ANT2527) and *dCAS9-SPO11/0* + gRNA-*MAL31prom* *spo11Δ/spo11Δ* (ANT2569) diploids, digested with *AvrII* and *SphI* and probed with a *MAL33* fragment.

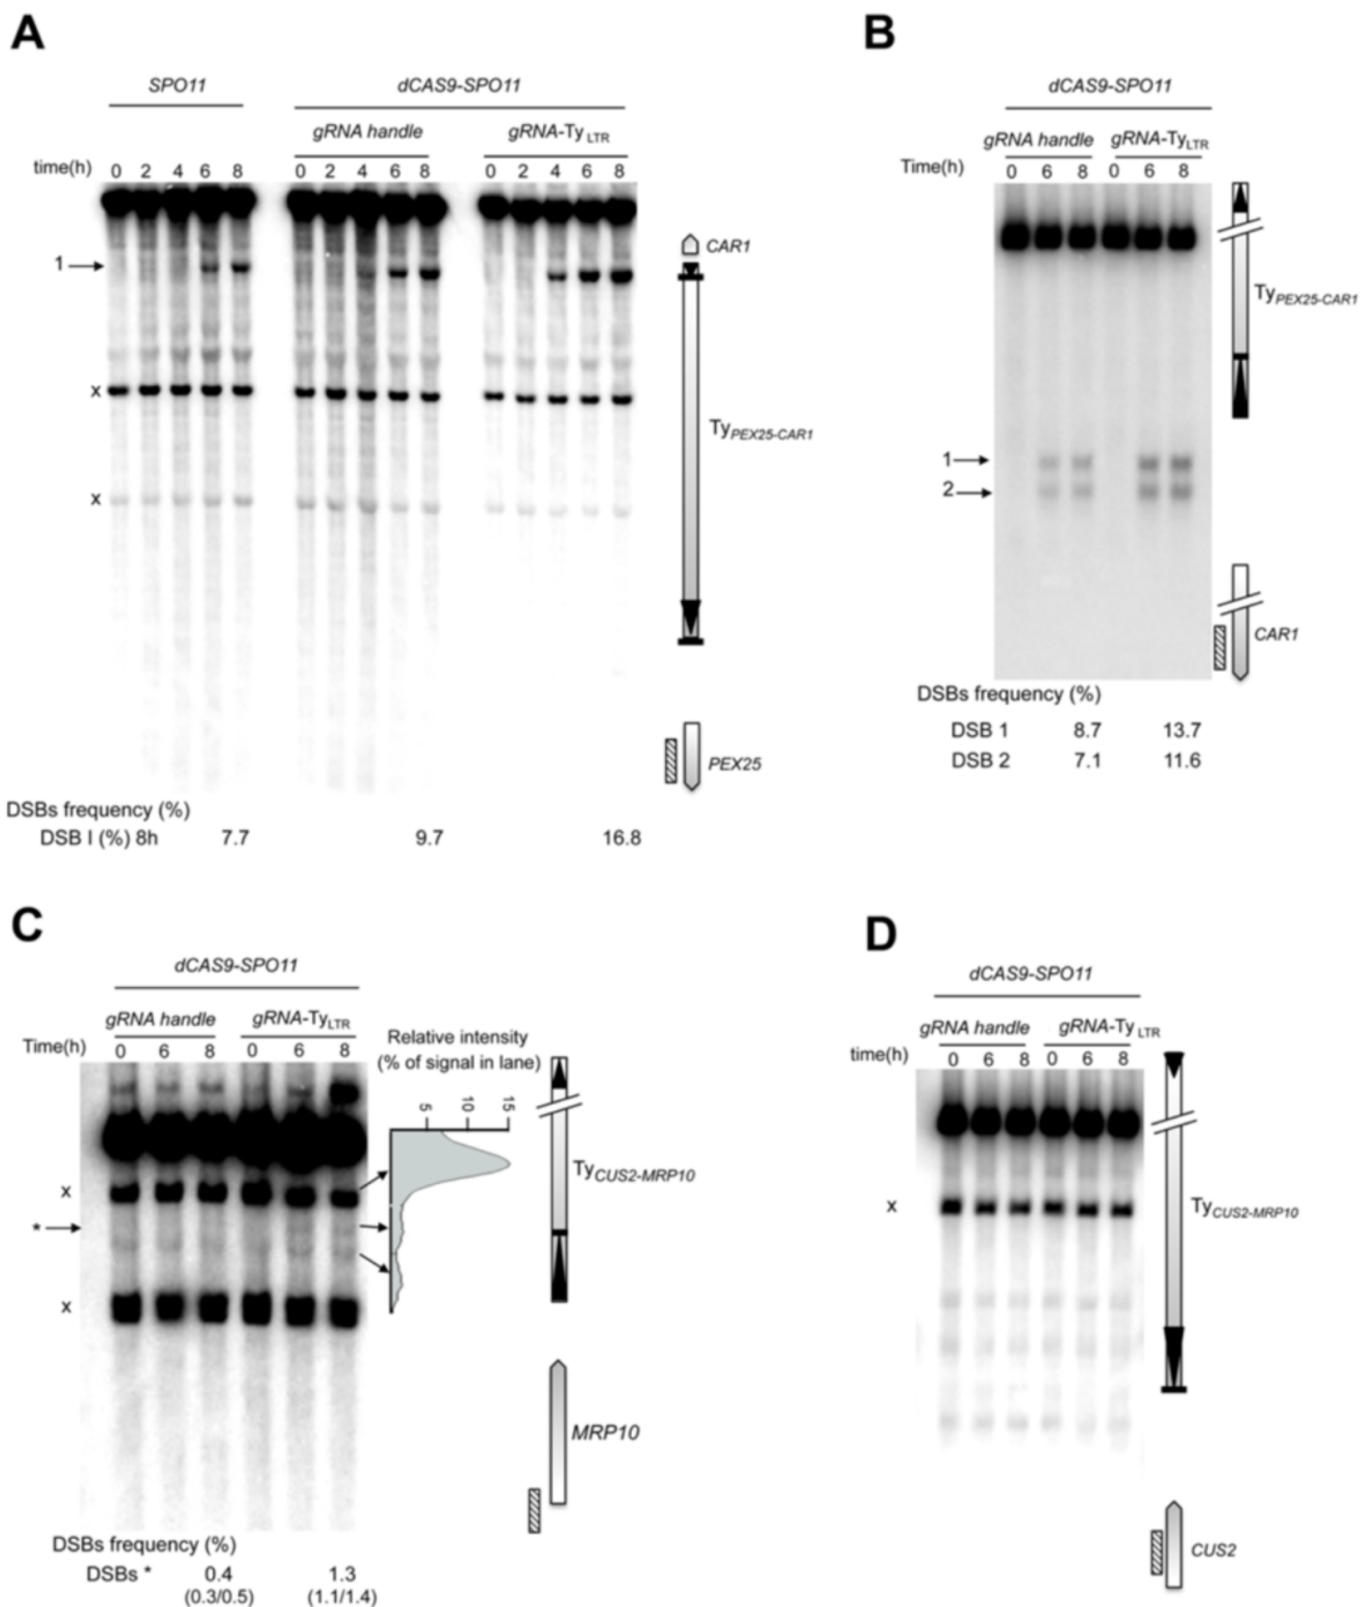

**Figure S9. CRISPR-dCas9-Spo11-mediated targeting of Ty LTR sequences.**

Natural and targeted DSB formation at the 5' and 3' extremities of the *Ty<sub>PEX25-CAR1</sub>* (**A-B**) and *Ty<sub>CUS2-MRP10</sub>* (**C-D**) elements was analyzed by Southern Blot. To examine precisely natural and targeted DSB formation at the 5' end of the *Ty<sub>PEX25-CAR1</sub>* a

higher resolution of DSB mapping was performed (**B**). The profile of DSB quantification in *dCAS9-SPO11* diploids expressing the gRNA-Ty<sub>LTR</sub> at the Ty<sub>CUS2-MRP10</sub> locus (t=8h) is shown to the right of **Supplementary Fig. 9C**. Cells were collected at the indicated time after transfer into sporulation medium (t=0h). CRISPR-dCas9-Spo11 target sites and probes are shown as black bars in Ty maps and as hatched rectangle in ORF maps, respectively; crosses indicate cross hybridizing bands. DSB values are from single experiments or the mean of two independent experiments with minimum and maximum values indicated into parentheses.

(**A**) genomic DNA was prepared from *SPO11/SPO11* (ORD7304), *dCAS9-SPO11/0* + gRNA-handle *spo11Δ/spo11Δ* (ANT2527) and *dCAS9-SPO11/0* + gRNA-Ty<sub>LTR</sub> *spo11Δ/spo11Δ* (ANT2562), diploids, digested with *NcoI* and probed with an internal *PEX25* fragment.

(**B**) genomic DNA was prepared from *SPO11/SPO11* (ORD7304), *dCAS9-SPO11/0* + gRNA-handle *spo11Δ/spo11Δ* (ANT2527) and *dCAS9-SPO11/0* + gRNA-Ty<sub>LTR</sub> *spo11Δ/spo11Δ* (ANT2562), diploids, digested with *SphI* and *XbaI* and probed with an internal *CAR1* fragment.

(**C**) DNA was prepared from *dCAS9-SPO11/0* + gRNA-handle *spo11Δ/spo11Δ* (ANT2527) and *dCAS9-SPO11/0* + gRNA-Ty<sub>LTR</sub> *spo11Δ/spo11Δ* (ANT2562) diploids, digested with *NaeI* and *SphI* and probed with an intergenic *MRP10-WSC2* fragment.

(**D**) genomic DNA was prepared from *SPO11/SPO11* (ORD7304), *dCAS9-SPO11/0* + gRNA-handle *spo11Δ/spo11Δ* (ANT2527) and *dCAS9-SPO11/0* + gRNA-Ty<sub>LTR</sub> *spo11Δ/spo11Δ* (ANT2562), diploids, digested with *SphI* and probed with an internal *CUS2* fragment.

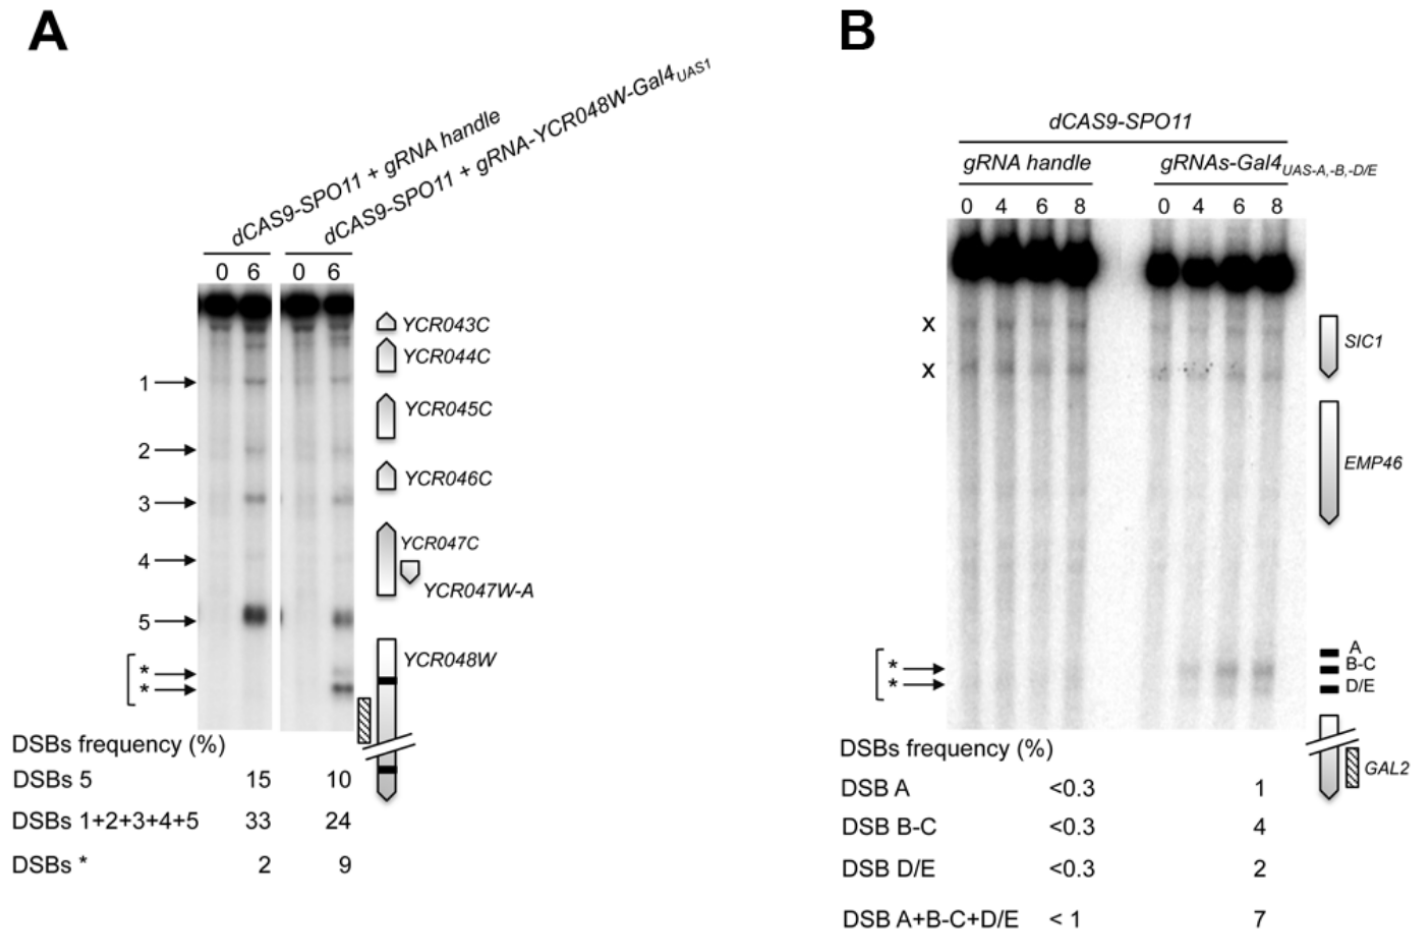

**Figure S10. CRISPR-dCas9-Spo11-targets meiotic DSBs in hot and cold regions in *SPO11* cells.**

Southern blot analysis of dCas9-Spo11 DSBs at the targeted *YCR048W* natural hotspot (**A**) and at the cold *GAL2* promoter regions (**B**) upon expression of a sgRNA or multiple gRNAs. Diploid *GAL4/GAL4* cells were collected at the indicated time after transfer into sporulation medium (t=0h). CRISPR-dCas9-Spo11 target sites are shown as black bars. At the left of the gel, arrowheads indicate wild-type (numbered) and targeted (asterisks) DSBs. Frequency of DSBs\* corresponds to the sum of frequencies detected in the *YCR048W* ORF (indicated by \*arrows).

(**A**) genomic DNA was prepared from *dCAS9-SPO11/0 + gRNA-handle* (ANT2518) and *dCAS9-SPO11/0 + gRNA-YCR048W-Gal4<sub>UAS1</sub>* (ANT2519) diploids, digested with *Asel* and probed with an internal *YCR048W* fragment.

(**B**) genomic DNA was prepared from *dCAS9-SPO11/0 + gRNA-handle* (ANT2518) and *dCAS9-SPO11/0 + gRNAs targeting GAL2prom-Gal4<sub>UAS-A,-B,-D/E</sub>* (ANT2713)



diploids, digested with *Xba*I and probed with an internal *GAL2* fragment. Crosses indicate cross hybridizing bands. DSB values are the means of two independent cultures when the standard deviation is indicated.
